# Supplementary material
Source: publisher figshare collection journal article supplement (https://tandf.figshare.com/ndownloader/files/17302796)
Supplement: Supplementary file 1 [file 17302796]

**Supplementary Materials**

**for**

**Fluoride and human health: Systematic appraisal of sources, exposures, metabolism, and toxicity**

*Humayun Kabir a, Ashok Kumar Gupta a,*, Subhasish Tripathyb*

a Environmental Engineering Division, Department of Civil Engineering, Indian Institute of Technology Kharagpur, Kharagpur 721302, India

b Department of Geology and Geophysics, Indian Institute of Technology Kharagpur, Kharagpur 721302, India

*Corresponding author.

E-mail: [kabir.humayun@iitkgp.ac.in](mailto:kabir.humayun@iitkgp.ac.in) (H. Kabir), agupta@civil.iitkgp.ac.in (A. K. Gupta), stripathy@iitkgp.ac.in (S. Tripathy).


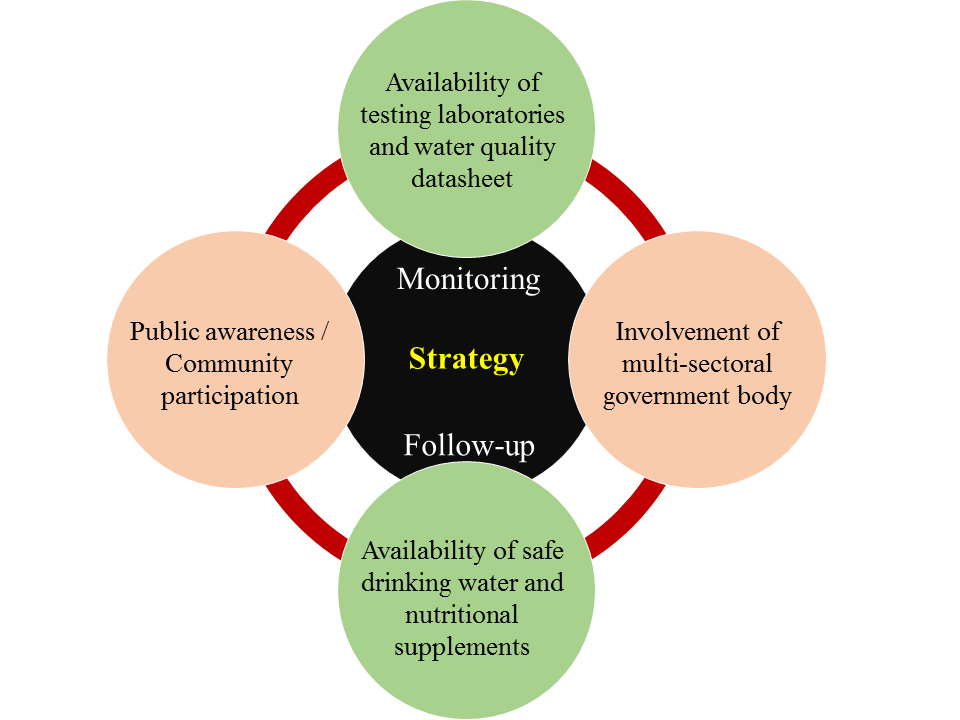
 **Fig. S1:** Strategy for prevention and mitigation of fluoride induced toxic health effect

**Table S1**: General properties of fluoride

| **Property** | | **Description** | **Property** | | **Description** |
| --- | --- | --- | --- | --- | --- |
| Atomic number | | 9 | Radius | Ionic (-1) | 0.133 nm |
| Atomic mass | | 18.9984 | Normal | 0.071 nm |
| Number of stable isotopes | | 1 | Electron affinity | | 332.6 KJ/mol |
| Atomic configuration | | 1S2 2S2 2P5 | Vanderwaals radius | | 0.135 nm |
| Density (at 20°C) | | 1.8 ×10-3 g/cm3 | Electronegativity | | 3.9 eV |
| Ionization energy | First | 1680.6 KJ/mol | Standard potential | | -2.87 V |
| Second | 3134 KJ/mol | Melting point | | -218.6 °C |
| Third | 6050 KJ/mol | Boiling point | | -188.6 °C |

[**Source:** (Fuge 1988; Schneider and Christe 1998)]

**Table S2:** Excessive groundwater fluoride concentration in different regions of the world

| **Location** | **Fluoride Level (mg L-1)** | **Reference** |
| --- | --- | --- |
| Alberta | >3-5 | (Grisak et al. 1977) |
| Algeria | >1.5-3 | (Messaïtfa 2008) |
| Southern Algeria | >1.5-3 | (Messaïtfa 2008) |
| Southeast Regions, Argentina | >10 | (Paoloni et al. 2003) |
| Chaco-Pampean, Argentina | >5-10 | (Nicolli et al. 2012) |
| Almirante Brown, Argentina | >3-5 | (Buchhamer et al. 2012) |
| Pampian Plain, Argentina | >10 | (Cabrera et al. 2001) |
| Buenosaires Province, Argentina | >3-5 | (Kruse and Ainchil 2003) |
| Australia | ≤1.5 | (Riordan and Banks 1991) |
| Gadabay, Azerbaijan | >3-5 | (Baghal Asghari et al. 2017) |
| Khulna, Bangladesh | >1.5-3 | (Fazlul Hoque 2013) |
| Rajshahi, Bangladesh | >1.5-3 | (Fazlul Hoque 2013) |
| Benin | ≤1.5 | (Silliman et al. 2007) |
| Bhutan | ≤1.5 | (Deki 2013) |
| Botswana | >3-5 | (Sabone 1994) |
| São Paulo, Brazil | >5-10 | (Martins et al. 2018) |
| Burkina Faso | ≤1.5 | (Kagambega and Galvez 2014) |
| Mayo Tsanaga River Basin, Cameroon | >10 | (Fantong et al. 2010) |
| North Cameroon | >10 | (Fantong et al. 2010) |
| Maria, Canada | >5-10 | (Boyle and Chagnon 1995) |
| Manitoba, Canada | >10 | (Desbarats 2009) |
| Lake Chad basin, Chad | ≤1.5 | (BGR (Bundesanstalt für Geowissenschaften und Rohstoffe) 2017) |
| Jilin Province, China | >5-10 | (Zhang et al. 2003) |
| Shanxi Province, China | >5-10 | (Wang et al. 2009) |
| Yuanmou County, China | >3-5 | (Chen et al. 2012) |
| Cambodia | ≤1.5 | (Irvine et al. 2006) |
| Anoumabo, Ivory Cost | >10 | (Osemwegie et al. 2013) |
| Croatia | ≤1.5 | (Lincir and Rosin-Grget 1993; Rosin-Grget and Lincir 1995) |
| La Salud, Cuba | ≤1.5 | (Künzel and Fischer 2000) |
| Las Tunas, Cuba | ≤1.5 | (Luna and Melián 2003) |
| Democratic Republic of Congo | >1.5-3 | (Laurent and Marie 2010) |
| Bønnerup Strand, Glesborg, Denmark | >1.5-3 | (Larsen et al. 1989) |
| Egypt | >1.5-3 | (Abdel-azeem 2009) |
| Eritrea | >3-5 | (Srikanth et al. 2002) |
| Estonia | >5-10 | (Indermitte et al. 2009) |
| Lowveld, Swaziland, Eswatini | >10 | (Manyatsi and Brown 2009) |
| Ethiopia | >10 | (Rango et al. 2012) |
| Ethiopia | >10 | (Rango et al. 2012) |
| Finland | >1.5-3 | (Lahermo et al. 1991; Sehn 2008) |
| Gabon | ≤1.5 | (Kut et al. 2016) |
| Georgia | ≤1.5 | (Windom 1971) |
| Germany | >5-10 | (Queste et al. 2001) |
| Upper Regions of Ghana | >3-5 | (Salifu et al. 2012) |
| Bongo District | >10 | (Antwi et al. 2011) |
| Bolgatanga Area, Northern Ghana | >3-5 | (Apambire et al. 1997) |
| Vounargo Area, Greece | ≤1.5 | (Karapanos et al. 2011) |
| Narssaq, Greenland | >1.5-3 | (Larsen et al. 1989) |
| Hordaland | >5-10 | (Bårdsen et al. 1996) |
| Assam, India | >10 | (Chakraborti et al. 2000) |
| Rajasthan, India | >10 | (Vikas et al. 2009) |
| Agra, India | >10 | (Gupta et al. 1999) |
| Haryana, India | >5-10 | (Meenakshi et al. 2004) |
| Tamil Nadu, India | >5-10 | (Karthikeyan et al. 2010) |
| Orissa, India | >3-5 | (Das et al. 2012) |
| Madhya Pradesh, India | >3-5 | (Thakur et al. 2013) |
| Asembagus, Indonesia | >3-5 | (Budipramana et al. 2002) |
| Indonesia | >3-5 | (Heikens et al. 2005) |
| Maku, Iran | >5-10 | (Asghari Moghaddam and Fijani 2008) |
| Isfahan, Iran | >1.5-3 | (Keramati et al. 2018) |
| Bushehr, Iran | >1.5-3 | (Keramati et al. 2018) |
| Shush, Iran | >1.5-3 | (KheradPisheh et al. 2016) |
| Ireland | ≤1.5 | (Clarkson and McLoughlin 2000) |
| Israel | >1.5-3 | (Biswas et al. 2017) |
| Italy | ≤1.5 | (Angelillo et al. 1998) |
| Japan | >5-10 | (Biswas et al. 2017) |
| Jordan | ≤1.5 | (Abu Rukah and Alsokhny 2004) |
| Kazakhstan | Not Found |  |
| Lemongo Spring, Kenya | >10 | (Thole 2013) |
| Gilgil, Kenya | >10 | (Kut et al. 2016) |
| Bondo-Rarieda, Kenya | >5-10 | (Wambu et al. 2014) |
| Upper East Region Nairobi area, Kenya | >10 | (Coetsiers et al. 2008; Thole 2013) |
| Kuwait | ≤1.5 |  |
| Al Zawia and Al Zahara, Libya | >10 | (Nasr et al. 2014) |
| North-east Libya | ≤1.5 | (Nair et al. 2006) |
| Alagilat City, Libya | >3-5 | (Elmabrok 2015) |
| Al Zawia, Libya | >5-10 | (Nasr et al. 2014) |
| Benghazi, Libya | ≤1.5 | (Huew et al. 2011) |
| Nsanje, Malawi | >5-10 | (Thole 2013) |
| Zomba, Malawi | >5-10 | (Thole 2013) |
| Lilongwe, Malawi | >5-10 | (Thole 2013) |
| Nkhotakota, Malawi | >5-10 | (Thole 2013) |
| Karonga, Malawi | >5-10 | (Thole 2013) |
| Southern Malawi (Zomba, and Mangoch) | >5-10 | (Sajidu, S. M. et al. 2008) |
| Balaka, Malawi | >5-10 | (Pritchard et al. 2008) |
| Chikwawa, Malawi | >10 | (Grimason et al. 2013) |
| Machinga, Malawi | >5-10 | (Sajidu et al. 2012) |
| Malaysia ((bottled drinking water) | ≤1.5 | (Rahim et al. 2014) |
| Taoudenni, Mali | >1.5-3 | (Kut et al. 2016) |
| Durango, Mexico | >5-10 | (Ortiz et al. 1998) |
| La Lagunera, Mexico | >3-5 | (Razo et al. 1993) |
| Laguna El Cuervo, Mexico | >5-10 | (Reyes-Gómez et al. 2015) |
| Myingyan, Myanmar | >1.5-3 | (Bacquart et al. 2015) |
| La Victoria Region, Mexico | >5-10 | (Valenzuela-Vásquez et al. 2006) |
| Mindanao | Not Found |  |
| Moldova | >10 | (Toma et al. 1999) |
| Inner Mongolia | >1.5-3 | (Xu et al. 2013) |
| Ben Guerir, Morocco | >3-5 | (Garmes et al. 2002) |
| Namibia | >1.5-3 | (Kut et al. 2016) |
| Bhaktapur, Nepal | >1.5-3 | (Thakur et al. 2015) |
| Netherland | ≤1.5 | (El-Gohary et al. 2010) |
| Tibiri, Niger | >5-10 | (Kut et al. 2016) |
| Langtang, Nigeria | >3-5 | (Wongdem et al. 2001) |
| Bomo, Nigeria | >1.5-3 | (Kut et al. 2016) |
| Maiduguri, Nigeria | >5-10 | (Kut et al. 2016) |
| Zango, Nigeria | >5-10 | (Tukur and N. 2014) |
| Enugu, Nigeria | ≤1.5 | (Akpata et al. 2009) |
| Norway | >1.5-3 | (Reimann et al. 1996) |
| Nunavut | Not Found |  |
| Ontario | ≤1.5 | (Howard and Beck 1993) |
| Tehsil Mailsi, Pakistan | >5-10 | (Rasool et al. 2015) |
| Lahore, Pakistan | >10 | (Farooqi et al. 2007; Rasool et al. 2015) |
| Tharparkar and Nagarparkar, Pakistan | >10 | (Naseem et al. 2010; Brahman et al. 2013) |
| D.G. Khan, Pakistan | ≤1.5 | (Malana and Khosa 2011) |
| Sialkot, Pakistan | ≤1.5 | (Ullah et al. 2009) |
| Tharparkar, Pakistan | >10 | (Brahman et al. 2013) |
| Khairpur Mir, Pakistan | >3-5 | (Ahmed Baig et al. 2009) |
| Manchar lake, Pakistan | ≤1.5 | (Kazi et al. 2009) |
| Mailsi, Pakistan | >5-10 | (Rasool et al. 2015) |
| East Punjab, Pakistan | >10 | (Farooqi et al. 2007) |
| Mithi, Pakistan | >10 | (Rafique et al. 2008) |
| Naranji area, Northwest Frontier Province, Pakistan | >5-10 | (Shah and Danishwar 2003) |
| Gaza Strip, Palestine | >5-10 | (Abu Jabal et al. 2014) |
| Philippines | Not Found |  |
| Poland | ≤1.5 | (Czarnowski et al. 1996) |
| Portugal | >1.5-3 | (Cordeiro et al. 2012) |
| Romania | Not Found |  |
| Russia | Not Found |  |
| Huye and Nyamagabe, Rwanda | ≤1.5 | (Nsengimana et al. 2012) |
| Al Baha, Saudi Arabia | >1.5-3 | (Alabdulaaly et al. 2013) |
| Eastern Province, Saudi Arabia | >3-5 | (Alabdulaaly et al. 2013) |
| Makkah Al-Mukaramma, Saudi Arabia | >1.5-3 | (Alabdulaaly et al. 2013) |
| Madina Al-Munnawara, Saudi Arabia | >1.5-3 | (Alabdulaaly et al. 2013) |
| Al Qassim, Saudi Arabia | >5-10 | (Alabdulaaly et al. 2013) |
| Riyadh, Saudi Arabia | >5-10 | (Alabdula’aly 1997) |
| Sine Saloum Region, Senegal | >5-10 | (Brouwer et al. 1988) |
| Vranjska Banja, Serbia | >10 | (Mandinic et al. 2010) |
| Valjevo, Serbia | ≤1.5 | (Mandinic et al. 2010) |
| Bombali District, Sierra Leone | ≤1.5 | (Kelman and Denenberg 2014) |
| Singapore | ≤1.5 | (Loh 1996) |
| Shabeellaha Dhexe, Somalia | >3-5 | (Kut et al. 2016) |
| Limpopo, South Africa | >10 | (Kut et al. 2016) |
| South Africa | >10 | (Rasool et al. 2018) |
| Geumsan County, South Korea | >5-10 | (Ahn 2012) |
| Gimcheon, South Korea | >1.5-3 | (Kim et al. 2011) |
| Province of Soria, Spain | >1.5-3 | (Pérez and Sanz 1999) |
| North Central Province, Sri Lanka | >5-10 | (Jayawardana et al. 2012) |
| Udawalawe, Sri Lanka | >5-10 | (Van Der Hoek et al. 2003) |
| Polonnaruwa, Sri Lanka | >10 | (Dharmagunawardhane and Dissanayake 2007) |
| Abu Groon, Sudan | >1.5-3 | (Ibrahim et al. 1995b) |
| Nubian, Sudan | >10 | (Hussein 2004) |
| Northern Sudan | >3-5 | (Ibrahim et al. 1995a) |
| East of Blue Nile Communities, Sudan | >5-10 | (Abdellah et al. 2012) |
| Karrary Locality, Sudan | ≤1.5 | (Salim et al. 2014)s |
| Gadderas, Paskallavik and Billesholm, Sweden | >5-10 | (Forsman 1974) |
| Syria | Not Found |  |
| Thailand | >3-5 | (Chuckpaiwong et al. 2000) |
| Taiwan | >3-5 | (Wu et al. 2010) |
| Tajikistan | Not Found |  |
| Arusha Maji ya Chai, Arumeru District, Tanzania | >10 | (Thole 2013; Kut et al. 2016) |
| Shinyanga Region, Tanzania | >10 | (Ghiglieri et al. 2012) |
| Zanzibar Island, Tanzania | >10 | (Mohamed et al. 2014) |
| Kpogan, Lome, Togo | ≤1.5 | (Tanouayi et al. 2016) |
| Gabes, Tunisia | >3-5 | (Ketata et al. 2011) |
| Gafsa, Tunisia | >3-5 | (Ketata et al. 2011) |
| La Louza, Tunisia | >3-5 | (Nasr et al. 2011)n |
| Middle and Eastern Part, Turkey | >10 | (Azbar and Türkman 2000) |
| Turkmenistan | Not Found |  |
| Western Region, Uganda | >1.5-3 | (Rwenyonyi et al. 1999, 2000) |
| Ukraine | >10 | (Biswas et al. 2017) |
| United Arab Emirates | ≤1.5 | (Walia et al. 2017) |
| United Kingdom | >1.5-3 | (Hillier et al. 2000) |
| Ohio, USA | >3-5 | (Reyes-Gómez et al. 2015) |
| Pennsylvanian, USA | >3-5 | (Senior and Sloto 2006) |
| Kentucky, USA | >10 | (Reyes-Gómez et al. 2015) |
| Texas, USA | >3-5 | (Segreto et al. 1984) |
| Nebraska, USA | >1.5-3 | (Gosselin et al. 1999)go |
| Venezuela | ≤1.5 | (Acevedo et al. 2007) |
| Ho Chi Minh, Vietnam | ≤1.5 | (Thuy et al. 2003) |
| Taiz city, Yemen | >3-5 | (Aqeel et al. 2017) |
| Sana'a, Yemen | >3-5 | (Al-Akwa and Al-Maweri 2018) |
| Zambia | >1.5-3 | (Bäumle et al. 2007) |
| Zimbabwe | >1.5-3 | (Mamuse and Watkins 2016) |

**Table S3:** Distribution of fluoride in various region of India

| **State** | **Location** | **Fluoride Level**  **(mg L-1)** | **Latitude** | **Longitude** | **Reference** |
| --- | --- | --- | --- | --- | --- |
| Andhra Pradesh | Lower Vamsdhara River Basin | ˃3-5 | 18.506124 | 83.972875 | (Rao 1997) |
| Anantapur District | ˃5-10 | 14.641809 | 77.495265 | (Rao and Devadas 2003) |
| Sarada River basin | ˃1.5-3 | 17.775418 | 82.937412 | (Devadas et al. 2007) |
| Varaha River Basin | ˃1.5-3 | 17.553997 | 82.722495 | (Rao 2009) |
| Talupula | ˃5-10 | 14.243041 | 78.253820 | (Nagaraju et al. 2017) |
| Gummanampadu Sub-basin | ˃3-5 | 16.329897 | 79.659768 | (Rao et al. 2013) |
| Coastal region between Chirala and Ongole | ˃1.5-3 | 15.673999 | 80.222546 | (Rao et al. 2017b) |
| Anantapur | ˃5-10 | 14.349920 | 77.996989 | (Reddy et al. 2015) |
| Chittoor | ˃3-5 | 13.217369 | 79.090784 | (Rao et al. 2014) |
| Guntur | ˃ 10 | 16.301763 | 80.432568 | (Rao et al. 2017a) |
| Hyderabad | ˃5-10 | 17.431237 | 78.437659 | (Udayalaxmi et al. 2010) |
| Krishna | ˃5-10 | 16.631158 | 80.808560 | (Saxena and Ahmed 2003) |
| Kurnool | ˃1.5-3 | 15.807376 | 78.021623 | (Rao et al. 2014) |
| Mahbubnagar | ˃1.5-3 | 16.753125 | 78.006141 | (Adimalla and Venkatayogi, 2017; CGWB, 2013) |
| Prakasam | ˃5-10 | 15.610269 | 79.405628 | (Sudarshan et al. 2018) |
| Nalgonda | ˃5-10 | 17.043785 | 79.258208 | (Kumar et al. 2017) |
| Assam | Guwahati | ≥5-10 | 26.141688 | 91.695284 | (Das et al. 2003) |
| Kamrup | ˃ 10 | 26.088629 | 91.393334 | (Lakshmi et al. 2017) |
| Diphu | ≤1.5 | 25.838504 | 93.416949 | (Kumar et al. 2016) |
| Goalpara | ≥3-5 | 26.084566 | 90.452954 | (Mazumdar et al. 2015) |
| Brahmaputra flood plains | ≤1.5 | 26.121659 | 91.982944 | (Das et al. 2017) |
| Karbianglong | ˃ 10 | 26.172421 | 93.277067 | (Kotoky et al. 2008) |
| Bihar | Rohtas | ˃1.5-3 | 25.045351 | 84.135387 | (Ray et al. 2000) |
| Gaya | ˃ 10 | 24.783153 | 84.979139 | (Yasmin et al. 2014) |
| Sabour | ≤1.5 | 25.247857 | 87.041462 | (Verma et al. 2017) |
| Aurangabad | Not Found | 24.752945 | 84.370780 |  |
| Banka | Not Found | 24.907229 | 86.852209 |  |
| Buxar | Not Found | 25.560227 | 84.003830 |  |
| Jamui | Not Found | 24.878605 | 86.206290 |  |
| Kaimur (Bhabua) | Not Found | 25.042078 | 83.598415 |  |
| Munger | Not Found | 25.370697 | 86.474708 |  |
| Nawada | Not Found | 24.884177 | 85.543197 |  |
| Supaul | Not Found | 26.242764 | 86.805552 |  |
| Chhattisgarh | Raigarh | ˃5-10 | 22.256226 | 83.408234 | (Beg et al. 2011) |
| Durg | ˃ 10 | 21.264905 | 81.367855 | (Giri et al. 2013) |
| Rajnandgaon | ˃ 10 | 20.998721 | 80.785514 | (Patel et al. 2017) |
| Bastar | ˃5-10 | 19.136037 | 81.814881 | (Vilasrao et al. 2014) |
| Ambikapur | ˃5-10 | 23.129021 | 83.165733 | (Vilasrao et al. 2014) |
| Balrampur | ˃3-5 | 23.753249 | 83.678467 | (Vilasrao et al. 2014) |
| Kanker | ˃1.5-3 | 20.170922 | 80.968785 | (Vilasrao et al. 2014) |
| Korba | ˃3-5 | 22.503651 | 82.487216 | (Vilasrao et al. 2014) |
| Surajpur | ˃ 10 | 23.411423 | 82.966674 | (Vilasrao et al. 2014) |
| Bilaspur | Not Found | 22.412066 | 82.056753 |  |
| Dantewada | ˃1.5-3 | 18.841293 | 81.409804 | (Anshumali et al. 2018) |
| Janjgir-Champa | Not Found | 21.924402 | 82.778019 |  |
| Jashpur | Not Found | 22.734064 | 83.815249 |  |
| Koriya | Not Found | 23.362404 | 82.316967 |  |
| Mahasamund | Not Found | 21.116520 | 82.101125 |  |
| Raipur | Not Found | 21.327593 | 81.836289 | (Khan and Jhariya 2017) |
| Surguja | Not Found | 22.967236 | 83.237352 |  |
| Delhi | Delhi | ˃3-5 | 28.660820 | 77.104053 | (Kumar et al. 2006) |
| National Capital Territory of Delhi | ˃ 10 | 28.735662 | 77.083230 | (Dash et al. 2010) |
| Roop Nagar | ˃5-10 | 28.686504 | 77.204065 | (Shekhar and Sarkar 2013) |
| East Delhi | Not Found | 28.623689 | 77.317074 |  |
| North West Delhi | Not Found | 28.755578 | 77.007180 |  |
| South Delhi | Not Found | 28.463349 | 77.209056 |  |
| South West Delhi | Not Found | 28.590776 | 76.971993 |  |
| West Delhi | Not Found | 28.667063 | 77.061482 |  |
| Kanjhwala | Not Found | 28.726491 | 76.999446 |  |
| Najafgarh | ˃ 10 | 28.612203 | 76.965991 | (Kumar et al. 2006) |
| Alipur | Not Found | 28.800342 | 77.135090 |  |
| Gujarat | Ahmadabad | ≤1.5 | 23.020118 | 72.581330 | (Barot 1998) |
| Mehsana and Banaskantha | ˃5-10 | 24.031804 | 72.094717 | (Barot 1998) |
| Mehsana | ˃5-10 | 23.611914 | 72.367209 | (Dhiman and Keshari 2006) |
| Kadi | ˃1.5-3 | 23.298342 | 72.333389 | (Salve et al. 2008) |
| Amreli | ˃5-10 | 21.610774 | 71.225489 | (MDWS 2018) |
| Anand | ˃3-5 | 22.556311 | 72.942650 | (MDWS 2018) |
| Banaskantha | ˃5-10 | 24.384757 | 71.901621 | (MDWS 2018) |
| Bharuch | ˃3-5 | 21.736690 | 72.990763 | (MDWS 2018) |
| Bhavnagar | ˃3-5 | 21.761753 | 72.157319 | (Mishra et al. 2009) |
| Dohad | ˃5-10 | 22.848915 | 74.255567 | (MDWS 2018) |
| Junagadh | Not Found | 21.514592 | 70.453568 |  |
| Kachchh | ˃3-5 | 23.421737 | 69.933987 | (Trivedi et al. 2012) |
| Narmada | ˃5-10 | 22.194433 | 76.809757 | (MDWS 2018) |
| Panchmahals | ˃5-10 | 22.727234 | 73.660999 | (MDWS 2018) |
| Patan | ˃ 10 | 23.847707 | 72.113379 | (MDWS 2018) |
| Rajkot | ˃1.5-3 | 22.268393 | 70.787929 | (Dhiman 2014) |
| Sabarkantha | ≤1.5 | 23.848574 | 73.061043 | (Acharya et al. 2008) |
| Surat | ˃1.5-3 | 21.185335 | 72.851294 | (Desai and Desai 2012) |
| Surendranagar | ˃3-5 | 22.865817 | 71.647802 | (MDWS 2018) |
| Vadodara | ˃3-5 | 22.294144 | 73.180899 | (MDWS 2018) |
| Haryana | Jind | ˃5-10 | 29.310866 | 76.306740 | (Meenakshi et al. 2004) |
| Hisar | ˃ 10 | 29.164256 | 75.739398 | (Ravindra and Garg 2006) |
| Pataudi | ˃1.5-3 | 28.324411 | 76.783468 | (Singh et al. 2007) |
| Haily Mandi | ˃5-10 | 28.345444 | 76.756066 | (Singh et al. 2007) |
| Harsaru | ˃1.5-3 | 28.452694 | 76.930839 | (Singh et al. 2007) |
| Motipura | ˃ 10 | 23.576329 | 72.957886 | (Garg et al. 2009) |
| Sirsa | ˃1.5-3 | 29.540858 | 75.021797 | (Mor et al. 2009) |
| Sainiwas | ˃ 10 | 28.826839 | 75.536594 | (Garg et al. 2009) |
| Faridabad | ˃1.5-3 | 28.436239 | 77.346854 | (MDWS 2018) |
| Gurgaon | ˃1.5-3 | 28.425878 | 77.011152 | (MDWS 2018) |
| Jhajjar | ˃5-10 | 28.611363 | 76.667930 | (Gupta and Misra 2018) |
| Kaithal | ˃5-10 | 29.757715 | 76.345594 | (MDWS 2018) |
| Kurushetra | ˃5-10 | 29.965994 | 76.893270 | (Dhankhar and Singh 2015) |
| Mahendragarh | ˃5-10 | 28.181004 | 76.230663 | (Saini 2017) |
| Panipat | ˃5-10 | 29.413666 | 76.986136 | (Bishnoi and Malik 2008) |
| Rewari | ˃5-10 | 28.199940 | 76.618700 | (Haritash et al. 2008) |
| Rohtak | ˃1.5-3 | 28.784217 | 76.566562 | (Bishnoi and Arora 2007) |
| Sonepat | ˃5-10 | 28.948338 | 77.063990 | (Haritash et al. 2008) |
| Siwani | ˃ 10 | 28.906241 | 75.610580 | (Haritash et al. 2008) |
| Jharkhand | Damodar River basin | ˃3-5 | 23.660357 | 86.021849 | (Singh et al. 2008) |
| Chukru | ˃ 10 | 23.172924 | 85.379007 | (Patel et al. 2014) |
| Jammu & Kashmir | Bishnah | ≤1.5 | 32.610664 | 74.857970 | (Khanna 2015) |
| Doda | ˃3-5 | 33.148498 | 75.545468 | (Arya et al. 2013) |
| Rajauri | ˃ 10 | 33.372798 | 74.320440 | (MDWS 2018) |
| Kargil | ˃1.5-3 | 34.546732 | 76.129010 | (MDWS 2018) |
| Karnataka | Gulbarga | ˃5-10 | 17.325547 | 76.823805 | (Latha et al. 1999) |
| Raichur | ˃5-10 | 16.217978 | 77.333849 | (Latha et al. 1999) |
| Bellary | ˃5-10 | 15.131952 | 76.893898 | (Latha et al. 1999) |
| Kolar | ˃3-5 | 13.141686 | 78.128917 | (Latha et al. 1999) |
| Tumkur and Chitradurga | ˃3-5 | 13.348541 | 77.114622 | (Latha et al. 1999) |
| Kheru | ˃ 10 | 17.318651 | 76.813192 | (Shivashankara et al. 2000) |
| Ilkal | ˃5-10 | 15.959254 | 76.110674 | (Tirumalesh et al. 2007) |
| Tamkur | ˃5-10 | 13.348545 | 77.084574 | (Mamatha and Rao 2010) |
| Shivani watershed area | ˃1.5-3 | 13.871990 | 76.199913 | (Kantharaja et al. 2012) |
| Bangalore | ˃ 10 | 12.932437 | 77.467308 | (Prakash and Somashekar 2006) |
| Markandeya River basin | ˃1.5-3 | 16.000154 | 74.700282 | (Ravikumar et al. 2011) |
| Bellary | Not Found | 15.125817 | 76.904888 |  |
| Bidar | Not Found | 17.901834 | 77.504665 |  |
| Bijapur | ˃1.5-3 | 16.818951 | 75.698828 | (Hiremath et al. 2011) |
| Chamarajanagar | ˃1.5-3 | 11.865805 | 76.909739 | (Basavarajappa and Manjunatha, 2016) |
| Chikmagalur | Not Found | 13.306403 | 75.775149 |  |
| Chitradurga | ˃1.5-3 | 14.216358 | 76.394627 | (Basavarajappa and Manjunatha 2015) |
| Davangere | ˃1.5-3 | 14.450384 | 75.907195 | (Manjappa et al. 2003) |
| Gadag | ˃ 10 | 15.218932 | 75.645919 | (Manjappa et al. 2003) |
| Mysore | Not Found | 12.291154 | 76.609645 |  |
| Farhatabad | ˃5-10 | 17.185040 | 76.791071 | (Kumar et al. 2011) |
| Tumkur | ˃3-5 | 13.339187 | 77.086635 | (Mamatha and Rao 2010) |
| Kerala | Palghat | ˃5-10 | 10.498712 | 76.500172 | (Shaji et al. 2007) |
| Palakkad | ˃1.5-3 | 10.782936 | 76.636230 | (Kukillaya and Narayanan 2014) |
| Malappuram | ˃ 10 | 11.060087 | 76.049756 | (MDWS 2018) |
| Kozhikode | ˃ 10 | 11.235548 | 75.851954 | (MDWS 2018) |
| Pathanamthitta | ˃5-10 | 9.261956 | 76.751352 | (MDWS 2018) |
| Wayanad | ˃ 10 | 11.712611 | 76.140794 | (MDWS 2018) |
| Thrissur | ˃ 10 | 10.486382 | 76.241218 | (MDWS 2018) |
| Maharashtra | Amravati | ˃5-10 | 20.912403 | 77.735977 | (MDWS 2018) |
| Chandrapur | ˃5-10 | 19.976385 | 79.276871 | (Dubey et al. 2018) |
| Dhule | ˃1.5-3 | 20.890196 | 74.755696 | (Patil et al. 2010) |
| Gadchiroli | ˃1.5-3 | 19.836531 | 79.959306 | (MDWS 2018) |
| Gondia | ˃1.5-3 | 21.445838 | 80.210213 | (MDWS 2018) |
| Jalna | Not Found | 19.842056 | 75.877022 |  |
| Nagpur | ˃5-10 | 21.065689 | 79.011907 | (Arif et al. 2015) |
| Nanded | ˃3-5 | 19.122275 | 77.289747 | (Pandith et al. 2017; MDWS 2018) |
| Gad River Basin | ˃3-5 | 16.249773 | 73.749850 | (Duraiswami and Patankar 2011) |
| Yavatmal district | ˃ 10 | 20.146848 | 78.202045 | (Pandith et al. 2016) |
| Madhya Pradesh | Chandidongri | ˃3-5 | - | - | (Chatterjee and Mohabey 1998) |
| Chhatarpur | ˃1.5-3 | 24.911611 | 79.588321 | (Avtar et al. 2013a) |
| Bhind | Not Found | 26.560041 | 78.795975 |  |
| Chhatarpur | ˃1.5-3 | 24.920800 | 79.603967 | (Avtar et al. 2013b) |
| Chhindwara | ˃ 10 | 22.041537 | 78.929900 | (MDWS 2018) |
| Datia | Not Found | 25.701045 | 78.629001 |  |
| Dewas | Not Found | 22.960744 | 76.058270 |  |
| Dhar | ˃ 10 | 22.593307 | 75.304885 | (MDWS 2018) |
| Guna | ˃ 10 | 24.634882 | 77.316152 | (MDWS 2018) |
| Gwalior | ˃3-5 | 26.182597 | 78.177877 | (MDWS 2018) |
| Harda | Not Found | 22.349674 | 77.096106 |  |
| Jabalpur | ˃5-10 | 23.148548 | 79.974489 | (MDWS 2018) |
| Jhabua | ˃5-10 | 22.766384 | 74.592455 | (MDWS 2018) |
| Khargaon | ˃5-10 | 21.820374 | 75.616840 | (MDWS 2018) |
| Mandsaur | Not Found | 24.071490 | 75.063662 |  |
| Rajgarh | Not Found | 23.870294 | 76.526598 |  |
| Satna | Not Found | 24.559370 | 80.802693 |  |
| Seoni | Not Found | 22.087466 | 79.546098 |  |
| Shajapur | Not Found | 23.418255 | 76.278602 |  |
| Sheopur | Not Found | 25.665852 | 76.697633 |  |
| Sidhi | Not Found | 24.065821 | 81.813536 |  |
| Shivpuri | ˃3-5 | 25.430654 | 77.685421 | (Singh and Kadam 2007) |
| Manipur | Imphal | ˃1.5-3 | 24.783033 | 93.951211 | (Oinam et al. 2012) |
| Thoubal | ≤1.5 | 24.537594 | 93.973126 | (Oinam et al. 2012) |
| Orissa | Nayagarh | ˃ 10 | 20.256005 | 84.923141 | (Kundu et al. 2001) |
| boden | ˃5-10 | 19.810819 | 82.773157 | (Dey et al. 2012) |
| Karlakot | ˃3-5 | 19.773009 | 82.931292 | (Patel et al. 2014) |
| Angul | ˃1.5-3 | 20.814302 | 85.129933 | (Reza and Singh 2013) |
| Balasore | ˃5-10 | 21.492916 | 86.912300 | (Das et al. 2012) |
| Bargarh | ˃5-10 | 21.348339 | 83.619628 | (MDWS 2018) |
| Bhadrak | Not Found | 21.062375 | 86.496448 |  |
| Bandh | Not Found | 22.327765 | 83.965855 |  |
| Cuttack | ˃1.5-3 | 20.484948 | 85.843004 | (MDWS 2018) |
| Debagarh | Not Found | 21.536122 | 84.725053 |  |
| Dhenkanal | Not Found | 20.662755 | 85.503181 |  |
| Jajpur | Not Found | 20.919215 | 86.165688 |  |
| Keonjhar | Not Found | 21.533077 | 85.659938 |  |
| Sonapur | Not Found | 20.846429 | 83.894879 |  |
| Punjab | Patiala | ≤1.5 | 30.311100 | 76.381884 | (Kumar et al. 2007) |
| Muktsar | ˃1.5-3 | 30.467234 | 74.505664 | (Kumar et al. 2007) |
| Amritsar | ˃3-5 | 31.616851 | 74.858432 | (MDWS 2018) |
| Bhatinda | ˃1.5-3 | 30.205765 | 74.968858 | (MDWS 2018) |
| Faridkot | ˃3-5 | 30.634693 | 74.756595 | (MDWS 2018) |
| Fatehgarh Sahib | ˃ 10 | 30.647369 | 76.396926 | (Vikas et al. 2009) |
| Firozepur | Not Found | 30.927079 | 74.619953 |  |
| Gurdaspur | ˃1.5-3 | 31.943366 | 75.275524 | (MDWS 2018) |
| Mansa | Not Found | 29.997671 | 75.401132 |  |
| Moga | ˃1.5-3 | 30.828714 | 75.182590 | (MDWS 2018) |
| Muktsar | Not Found | 30.465308 | 74.506695 |  |
| Ghanaur | ˃5-10 | 30.332922 | 76.611623 | (MDWS 2018) |
| Sangrur | ˃3-5 | 30.237302 | 75.847468 | (MDWS 2018) |
| Rajasthan | Pushkar valley | ˃ 10 | 26.489417 | 74.550397 | (Datta et al. 1999) |
| Ajmer | ˃3-5 | 26.446928 | 74.625171 | (Vikas et al. 2009) |
| Hanumangarh | ˃3-5 | 29.585134 | 74.332722 | (Suthar et al. 2008) |
| Bhilwara | ˃ 10 | 25.341879 | 74.625392 | (Hussain et al. 2012) |
| Nagaur | ˃5-10 | 27.202380 | 73.733291 | (Arif et al. 2012) |
| Pokhran | ˃3-5 | 26.924633 | 71.901583 | (Singh et al. 2011) |
| Alwar | ˃3-5 | 27.563779 | 76.631135 | (Mudgal et al. 2015) |
| Banaswara | ˃3-5 | 23.542034 | 74.434897 | (Choubisa 2001) |
| Barmer | ˃3-5 | 25.772602 | 71.400789 | (Saxena and Ahmed 2003) |
| Bharatpur | Not Found | 27.220645 | 77.503690 |  |
| Bhilwara | ˃5-10 | 25.344828 | 74.625054 | (Hussain et al. 2012) |
| Bikaner | Not Found | 28.029747 | 73.316156 |  |
| Bundi | ˃3-5 | 25.436523 | 75.641097 | (MDWS 2018) |
| Chittaurgarh | Not Found | 24.886744 | 74.637330 |  |
| Churu | ˃ 10 | 28.299762 | 74.964950 | (MDWS 2018) |
| Dausa | ˃3-5 | 26.899022 | 76.341872 | (MDWS 2018) |
| Dhaulpur | Not Found | 26.696432 | 77.874669 |  |
| Dungarpur | ˃3-5 | 23.853797 | 73.713526 | (Choubisa 2001) |
| Ganganagar | ˃ 10 | 29.913857 | 73.879065 | (MDWS 2018) |
| Hanumangarh | Not Found | 29.581104 | 74.329631 |  |
| Jaipur | ˃5-10 | 26.910803 | 75.792004 | (MDWS 2018) |
| Jaisalmer | ˃3-5 | 26.900659 | 70.889621 | (MDWS 2018) |
| Jalor | ˃5-10 | 25.123455 | 72.345615 | (MDWS 2018) |
| Jhunjhunun | ˃5-10 | 28.123551 | 75.393831 | (MDWS 2018) |
| Jodhpur | ˃ 10 | 26.270019 | 73.010948 | (MDWS 2018) |
| Karauli | ˃3-5 | 26.494235 | 77.017948 | (MDWS 2018) |
| Kota | ˃3-5 | 25.205055 | 75.886342 | (MDWS 2018) |
| Nagaur | ˃ 10 | 27.203755 | 73.723533 | (MDWS 2018) |
| Pali | ˃5-10 | 25.769328 | 73.314992 | (MDWS 2018) |
| Rajsamand | ˃5-10 | 25.065349 | 73.871090 | (MDWS 2018) |
| Sirohi | ˃3-5 | 24.894858 | 72.836717 | (MDWS 2018) |
| Sikar | ˃5-10 | 27.622868 | 75.134880 | (MDWS 2018) |
| Sawai Madhopur | ˃3-5 | 26.036262 | 76.362220 | (MDWS 2018) |
| Tonk | Not Found | 26.167166 | 75.794064 | (MDWS 2018) |
| Udaipur | Not Found | 24.630496 | 73.698008 | (Choubisa 2001) |
| Tamil Nadu | Salem and Namakkal | ˃ 10 | 11.177624 | 78.201064 | (Periakali et al. 2001) |
| Chennai | ˃1.5-3 | 13.013788 | 80.159751 | (Giridharan et al. 2008) |
| Neyveli | ˃ 10 | 11.544746 | 79.467655 | (Jayaprakash et al. 2008) |
| Tirupur | ˃1.5-3 | 11.124737 | 77.353162 | (Arumugam and Elangovan 2009) |
| Dindigul | ˃3-5 | 10.372497 | 77.972728 | (Viswanathan et al. 2009) |
| Erode | ˃5-10 | 11.346613 | 77.701026 | (Karthikeyan et al. 2010) |
| Thirumanimuttar sub-basin | ˃3-5 | 11.047952 | 77.972554 | (Vasanthavigar et al. 2010) |
| Kancheepuram | ˃3-5 | 12.833700 | 79.700948 | (Dar et al. 2011) |
| Manur | ˃3-5 | 08.856212 | 77.651657 | (Gopalakrishnan et al. 2012) |
| Mettur | ˃3-5 | 11.789206 | 77.805911 | (Srinivasamoorthy et al. 2012) |
| Thoothukudi | ˃3-5 | 8.844327 | 77.793709 | (Singaraja et al. 2014) |
| Krishnagiri | ˃5-10 | 12.524206 | 78.205700 | (Manikandan et al. 2014) |
| Madurai | ˃1.5-3 | 09.930150 | 78.129392 | (Thivya et al. 2017) |
| Dharmapuri | ˃5-10 | 12.127749 | 78.153285 | (Jagadeshan et al. 2015) |
| Pambar River basin | ˃3-5 | 12.327295 | 78.522857 | (Brindha et al. 2016) |
| Perambalur | ≤1.5 | 11.239126 | 78.876089 | (Ahamed et al. 2013) |
| Puddukotai | ≤1.5 | 10.382884 | 78.818733 | (Ilangeswaran et al. 2009) |
| Ramanathapuram | ˃1.5-3 | 9.370200 | 78.841092 | (Sivasankar et al. 2013) |
| Tondiar river basin | ≤1.5 | 12.329728 | 79.500943 | (Ramesh and Elango 2012) |
| Vellore | ˃1.5-3 | 12.898960 | 79.099485 | (Kumar et al. 2014) |
| Tiruchirapally | Not Found | 10.818861 | 78.708317 |  |
| Telangana | Siddipet | ˃1.5-3 | 18.100986 | 78.845209 | (Narsimha and Sudarshan 2017a) |
| Basara | ˃3-5 | 18.877127 | 77.949783 | (Narsimha and Sudarshan 2017b) |
| Nalgonda | ˃ 10 | 17.221459 | 79.302287 | (Brindha et al. 2016) |
| Vaniyar River basin | ˃5-10 | 12.120655 | 78.328670 | (Brindha et al. 2016) |
| Ranga Reddy | ˃3-5 | 17.246780 | 78.011597 | (Sujatha 2003) |
| Ranga Reddy (South Eastern part) | ˃3-5 | 17.020667 | 78.626266 | (Sujatha 2003) |
| Maheshwaram | ˃3-5 | 17.133256 | 78.425674 | (Sreedevi et al. 2006) |
| Kurmapalli watershed | ˃ 10 | 16.899773 | 78.720009 | (Mondal et al. 2009) |
| Wailapally watershed | ˃5-10 | 17.079846 | 78.859682 | (Reddy et al. 2010) |
| Adilabad | ˃3-5 | 19.659835 | 78.533076 | (Narsimha and Sudarshan 2017b) |
| Medak | ˃5-10 | 17.901479 | 78.193927 | (Narsimha and Sudarshan 2018) |
| Karimnagar | ˃1.5-3 | 18.443276 | 79.138692 | (Ramesh and Kavitha 2016) |
| Khammam | ˃1.5-3 | 17.257194 | 80.162424 | (Shanthi et al. 2014) |
| Uttar Pradesh | Agra | ˃ 10 | 27.181315 | 78.005031 | (Gupta et al. 1999) |
| Saidabad | ˃1.5-3 | 25.369567 | 82.114567 | (Misra and Mishra 2007a) |
| Mat | ˃1.5-3 | 27.633406 | 77.710564 | (Misra and Mishra 2007b) |
| Kanpur | ˃5-10 | 26.470465 | 80.329016 | (Sankararamakrishnan et al. 2008) |
| Unnao | ˃ 10 | 26.550547 | 80.494302 | (Jha et al. 2009a, b) |
| Varuna River Basin | ˃1.5-3 | 25.249951 | 82.499641 | (Raju et al. 2009b) |
| Sonbhadra | ˃5-10 | 24.448327 | 83.037884 | (Raju et al. 2009a) |
| Marks Nagar | ˃ 10 | - | - | (Jha et al. 2010) |
| Upper Panda River basin | ˃5-10 | 24.335247 | 83.338540 | (Raju et al. 2012) |
| Bundelkhand | ˃3-5 | 25.453254 | 78.608927 | (Avtar et al. 2013a) |
| Aligarh | ˃1.5-3 | 27.908193 | 78.071093 | (Rahman and Nasir 2017) |
| Etah | ˃1.5-3 | 27.559964 | 78.658879 | (Saxena and Ahmed 2003) |
| Firozabad | ≤1.5 | 27.165012 | 78.383121 | (Verma et al. 2000) |
| Rae Bareli | ˃3-5 | 26.248818 | 81.041901 | (Kanaujia et al. 2013) |
| Kannauj | Not Found | 27.045440 | 79.914502 |  |
| Mahamaya Nagar | Not Found | 27.578068 | 78.138215 |  |
| Mainpuri | Not Found | 27.229205 | 79.014289 |  |
| Mathura | ˃3-5 | 27.483170 | 77.678280 | (Razdan et al. 2017) |
| Mau | Not Found | 25.941811 | 83.558190 |  |
| Janghai | ˃1.5-3 | 25.551531 | 82.310622 | (Saxena and Ahmed 2003) |
| Uttara khand | Nainital | ≤1.5 | 29.388044 | 79.451555 | (Jain et al. 2010) |
| West Bengal | Nalhati | ˃1.5-3 | 24.293254 | 87.834283 | (Gupta et al. 2006) |
| Hooghly | ≤1.5 | 22.877680 | 87.925261 | (Kundu and Mandal 2009) |
| Bankura | ˃ 10 | 23.180409 | 87.230710 | (Chakrabarti and Bhattacharya 2013) |
| Rampurhat | ˃ 10 | 24.182302 | 87.786689 | (Mondal and George 2015) |
| Junidpur and Nowapara | ˃ 10 | 24.278303 | 88.003235 | (Mondal et al. 2016) |
| Haringhata | ≤1.5 | 22.960438 | 88.568000 | (Datta et al. 2014) |
| Palta | ˃1.5-3 | 22.785711 | 88.371503 | (Datta et al. 2014) |
| Rondiha | ˃1.5-3 | 23.389632 | 87.480580 | (Datta et al. 2014) |
| Midnapore Town | ≤1.5 | 22.432163 | 87.310361 | (Datta et al. 2014) |
| Hijli | ≤1.5 | 22.322198 | 87.330348 | (Datta et al. 2014) |
| La0manpur | ≤1.5 | 23.440944 | 87.008741 | (Datta et al. 2014) |
| Purulia | ˃ 10 | 23.234825 | 86.543831 | (Bhattacharya and Chakrabarti 2011) |
| Bardhaman | Not Found | 23.249367 | 87.853528 |  |
| Dakshindinajpur | Not Found | 25.396382 | 88.574972 |  |
| Malda | Not Found | 25.154292 | 88.097088 |  |
| Nadia | Not Found | 23.361636 | 88.535848 |  |
| Uttardinajpur | Not Found | 25.724712 | 88.099894 |  |

**Table S4**: Form of fluoride present near the earth surface

| **Gaseous form** | **Particulate form** |
| --- | --- |
| Hydrogen fluoride (HF), Sulfur hexafluoride (SF6), Hexafluorosilicic acid (SiF6 2−), Silicon tetrafluoride (SiF4) | Calcium fluoride, Sodium hexafluorosilicate, Sodium aluminum fluoride, Aluminum fluoride, Calcium phosphate fluoride and Lead fluoride |

**Reference**

Abdel-azeem A (2009) Microbiological and physicochemical analysis of groundwater and its biological effect on population in Saint Katherine Protectorate, Egypt. Thirteen Int Water Technol Conf IWTC 13:1491–1513.

Abdellah AM, Abdel-Magid HM, Yahia NA (2012) Effect of long-term pumping on fluoride concentration levels in groundwater: A case study from east of blue Nile communities of Sudan. J Appl Sci 12:1345–1354. doi: 10.3923/jas.2012.1345.1354

Abu Jabal MS, Abustan I, Rozaimy MR, Al-Najar H (2014) Fluoride enrichment in groundwater of semi-arid urban area: Khan Younis City, southern Gaza Strip (Palestine). J African Earth Sci 100:259–266. doi: 10.1016/J.JAFREARSCI.2014.07.002

Abu Rukah Y, Alsokhny K (2004) Geochemical assessment of groundwater contamination with special emphasis on fluoride concentration, North Jordan. Chemie der Erde - Geochemistry 64:171–181. doi: 10.1016/J.CHEMER.2003.11.003

Acevedo AM, Febres-Cordero C, Feldman S, et al (2007) Urinary fluoride excretion in children aged 3 to 5 years exposed to fluoridated salt at 60 to 90 mgF/Kg in two Venezuelan cities. A pilot study. Acta Odontol Latinoam 20:9–16.

Acharya GD, Hathi M V., Patel AD, Parmar KC (2008) Chemical properties of groundwater in Bhiloda Taluka Region, North Gujarat, India. E-Journal Chem 5:792–796. doi: 10.1155/2008/592827

Adimalla N, Venkatayogi S (2017) Mechanism of fluoride enrichment in groundwater of hard rock aquifers in Medak, Telangana State, South India. Environ Earth Sci 76:45. doi: 10.1007/s12665-016-6362-2

Ahamed AJ, Ananthakrishnan S, Loganathan K, Manikandan K (2013) Assessment of groundwater quality for irrigation use in Alathur Block, Perambalur District, Tamilnadu, South India. Appl Water Sci 3:763–771. doi: 10.1007/s13201-013-0124-z

Ahmed Baig J, Gul Kazi T, Balal Arain M, et al (2009) Evaluation of arsenic and other physico-chemical parameters of surface and ground water of Jamshoro, Pakistan. J Hazard Mater 166:662–669. doi: 10.1016/j.jhazmat.2008.11.069

Ahn JS (2012) Geochemical occurrences of arsenic and fluoride in bedrock groundwater: a case study in Geumsan County, Korea. Environ Geochem Health 34:43–54. doi: 10.1007/s10653-011-9411-5

Akpata ES, Danfillo IS, Otoh EC, Mafeni JO (2009) Geographical mapping of fluoride levels in drinking water sources in Nigeria. Afr Health Sci 9:227–33.

Al-Akwa AA, Al-Maweri SA (2018) Dental caries prevalence and its association with fluoride level in drinking water in Sana’a, Yemen. Eur J Dent 12:15–20. doi: 10.4103/ejd.ejd_187_17

Alabdula’aly AI (1997) Fluoride content in drinking water supplies of Riyadh, Saudi Arabia. Environ Monit Assess 48:261–272. doi: 10.1023/A:1005795820508

Alabdulaaly AI, Al-Zarah AI, Khan MA (2013) Occurrence of fluoride in ground waters of Saudi Arabia. Appl Water Sci 3:589–595. doi: 10.1007/s13201-013-0105-2

Angelillo IF, Anfosso R, Nobile CGA, Pavia M (1998) Prevalence of dental caries in schoolchildren in Italy. Eur J Epidemiol 14:351–357. doi: 10.1023/A:1007471707836

Anshumali, Kumar M, Chanda N, et al (2018) GGeochemical assessment of fluoride pollution in groundwater of tribal region in India. Bull Environ Contam Toxicol 100:421–429. doi: 10.1007/s00128-017-2267-3

Antwi E, Bensah EC, Ahiekpor JC (2011) Use of solar water distiller for treatment of fluoride-contaminated water: The case of Bongo district of Ghana. Desalination 278:333–336. doi: 10.1016/J.DESAL.2011.05.044

Apambire WB, Boyle DR, Michel FA (1997) Geochemistry, genesis, and health implications of fluoriferous groundwaters in the upper regions of Ghana. Environ Geol 33:13–24. doi: 10.1007/s002540050221

Aqeel A, Al-Amry A, Alharbi O (2017) Assessment and geospatial distribution mapping of fluoride concentrations in the groundwater of Al-Howban Basin, Taiz-Yemen. Arab J Geosci 10:312. doi: 10.1007/s12517-017-3069-y

Arif M, Hussain I, Hussain J, et al (2012) Fluoride in the drinking water of Nagaur Tehsil of Nagaur District, Rajasthan, India. Bull Environ Contam Toxicol 88:870–875. doi: 10.1007/s00128-012-0572-4

Arif M, Hussain I, Hussain J, et al (2015) GIS-based inverse distance weighting spatial interpolation technique for fluoride distribution in south west part of Nagaur district, Rajasthan. Cogent Environ Sci 1:1038944. doi: 10.1080/23311843.2015.1038944

Arumugam K, Elangovan K (2009) Hydrochemical characteristics and groundwater quality assessment in Tirupur Region, Coimbatore District, Tamil Nadu, India. Environ Geol 58:1509–1520. doi: 10.1007/s00254-008-1652-y

Arya S, Gazal S, Raina AK (2013) Prevalence and severity of dental fluorosis in some endemically afflicted villages of district Doda, Jammu and Kashmir, India. J Appl Nat Sci 5:406–410. doi: 10.31018/jans.v5i2.342

Asghari Moghaddam A, Fijani E (2008) Distribution of fluoride in groundwater of Maku area, northwest of Iran. Environ Geol 56:281–287. doi: 10.1007/s00254-007-1163-2

Avtar R, Kumar P, Singh CK, et al (2013a) Hydrogeochemical assessment of groundwater quality of Bundelkhand, India using statistical approach. Water Qual Expo Heal 5:105–115. doi: 10.1007/s12403-013-0094-2

Avtar R, Kumar P, Surjan A, et al (2013b) Geochemical processes regulating groundwater chemistry with special reference to nitrate and fluoride enrichment in Chhatarpur area, Madhya Pradesh, India. Environ Earth Sci 70:1699–1708. doi: 10.1007/s12665-013-2257-7

Azbar N, Türkman A (2000) Defluoridation in drinking waters. Water Sci Technol 42:403–407. doi: 10.2166/wst.2000.0346

Bacquart T, Frisbie S, Mitchell E, et al (2015) Multiple inorganic toxic substances contaminating the groundwater of Myingyan Township, Myanmar: Arsenic, manganese, fluoride, iron, and uranium. Sci Total Environ 517:232–245. doi: 10.1016/J.SCITOTENV.2015.02.038

Baghal Asghari F, Mohammadi AA, Aboosaedi Z, et al (2017) Data on fluoride concentration levels in cold and warm season in rural area of Shout (West Azerbaijan, Iran). Data Br 15:528–531. doi: 10.1016/j.dib.2017.10.012

Bårdsen A, Bjorvatn K, Selvig KA (1996) Variability in fluoride content of subsurface water reservoirs. Acta Odontol Scand 54:343–347. doi: 10.3109/00016359609003549

Barot V V (1998) Occurrence of endemic fluorosis in human population of North Gujarat, India: human health risk. Bull Environ Contam Toxicol 61:303–10. doi: 10.1007/S001289900763

Basavarajappa HT*, Manjunatha MC PK (2016) Rock-Water interaction and chemical quality analysis of groundwater in hard rock terrain of Chamrajanagara district, Karnataka, India using Geoinformatics. J Org Inorg Chem 2:1–11. doi: 10.21767/2472-1123.100001

Basavarajappa HT, Manjunatha MC (2015) Groundwater Quality Analysis in Precambrian Rocks of Chitradurga District, Karnataka, India Using Geo-informatics Technique. Aquat Procedia 4:1354–1365. doi: 10.1016/j.aqpro.2015.02.176

Bäumle R, Neukum C, Nkhoma J, Silembo O (2007) The groundwater resources of southern Province.

Beg MK, Srivastav SK, Carranza EJM, de Smeth JB (2011) High fluoride incidence in groundwater and its potential health effects in parts of Raigarh District, Chhattisgarh, India. Curr Sci 100:750–754. doi: 10.2307/24075817

BGR (Bundesanstalt für Geowissenschaften und Rohstoffe) (2017) TC Lake Chad Basin: Groundwater Management. https://www.bgr.bund.de/EN/Themen/Wasser/Projekte/abgeschlossen/TZ/Tschad/tschad-I_fb_en.html. Accessed 20 Dec 2018

Bhattacharya HN, Chakrabarti S (2011) Incidence of fluoride in the groundwater of Purulia District, West Bengal: A geo-environmental appraisal. Curr. Sci. 101:152–155.

Bishnoi M, Arora S (2007) Potable groundwater quality in some villages of Har yana, India: Focus on fluoride. J Environ Biol 29:291–294.

Bishnoi M, Malik R (2008) Ground water quality in environmentally degraded localities of Panipat city, India. J Environ Biol 29:881–6.

Biswas G, Kumari M, Adhikari K, Dutta S (2017) A critical review on occurrence of fluoride and its removal through adsorption with an emphasis on natural minerals. Curr Pollut Reports 3:104–119. doi: 10.1007/s40726-017-0054-8

Boyle DR, Chagnon M (1995) An incidence of skeletal fluorosis associated with groundwaters of the maritime carboniferous basin, Gasp region, Quebec, Canada. Environ Geochem Health 17:5–12. doi: 10.1007/BF00188625

Brahman KD, Kazi TG, Afridi HI, et al (2013) Simultaneously evaluate the toxic levels of fluoride and arsenic species in underground water of Tharparkar and possible contaminant sources: A multivariate study. Ecotoxicol Environ Saf 89:95–107. doi: 10.1016/J.ECOENV.2012.11.023

Brindha K, Jagadeshan G, Kalpana L, Elango L (2016) Fluoride in weathered rock aquifers of southern India: Managed Aquifer Recharge for mitigation. Environ Sci Pollut Res 23:8302–8316. doi: 10.1007/s11356-016-6069-7

Brouwer ID, Dirks OB, De Bruin A, Hautvast JG (1988) Unsuitability of World Health Organisation guidelines for fluoride concentrations in drinking water in Senegal. Lancet 1:223–5.

Buchhamer EE, Blanes PS, Osicka RM, Giménez MC (2012) Environmental risk assessment of arsenic and fluoride in the chaco province, Argentina: Research advances. In: Journal of Toxicology and Environmental Health - Part A: Current Issues. Taylor & Francis Group, pp 1437–1450

Budipramana ES, Hapsoro A, Irmawati ES, Kuntari S (2002) Dental fluorosis and caries prevalence in the fluorosis endemic area of Asembagus, Indonesia. Int J Paediatr Dent 12:415–422. doi: 10.1046/j.1365-263X.2002.00398.x

Cabrera A, Blarasin M, Villalba G (2001) Groundwater contaminated with arsenic and fluoride in the Argentine Pampean plain 9:Paper 6.

CGWB, Central Ground Water Board, Ministry of Water Resources Govt. of India (2013) Ground Water Brochure.

Chakrabarti S, Bhattacharya HN (2013) Inferring the hydro-geochemistry of fluoride contamination in Bankura district, West Bengal: A case study. J Geol Soc India 82:379–391. doi: 10.1007/s12594-013-0165-9

Chakraborti D, Chanda CR, Samanta G, et al (2000) Fluorosis in Assam, India. Curr Sci 78:1421–1423.

Chatterjee MK, Mohabey NK (1998) Potential fluorosis problems around Chandidongri, Madhya Pradesh, India. Environ Geochem Health 20:1–4. doi: 10.1023/A:1006529925395

Chen H, Yan M, Yang X, et al (2012) Spatial distribution and temporal variation of high fluoride contents in groundwater and prevalence of fluorosis in humans in Yuanmou County, Southwest China. J Hazard Mater 235–236:201–209. doi: 10.1016/j.jhazmat.2012.07.042

Choubisa SL (2001) Endemic fluorosis in southern Rajasthan, India. Fluoride 34:61–70.

Chuckpaiwong S, Nakornchai S, Surarit R, et al (2000) Fluoride in water consumed by children in remote areas of Thailand. Southeast Asian J Trop Med Public Health 31:319–324.

Clarkson JJ, McLoughlin J (2000) Role of fluoride in oral health promotion. Int Dent J 50:119–128. doi: 10.1111/j.1875-595X.2000.tb00552.x

Coetsiers M, Kilonzo F, Walraevens K (2008) Hydrochemistry and source of high fluoride in groundwater of the Nairobi area, Kenya. Hydrol Sci J 53:1230–1240. doi: 10.1623/hysj.53.6.1230

Cordeiro S, Coutinho R, Cruz JV (2012) Fluoride content in drinking water supply in São Miguel volcanic island (Azores, Portugal). Sci Total Environ 432:23–36. doi: 10.1016/J.SCITOTENV.2012.05.070

Czarnowski W, Wrześniowska K, Krechniak J (1996) Fluoride in drinking water and human urine in Northern and Central Poland. Sci Total Environ 191:177–184. doi: 10.1016/0048-9697(96)05259-X

Dar MA, Sankar K, Dar IA (2011) Fluorine contamination in groundwater: a major challenge. Environ Monit Assess 173:955–968. doi: 10.1007/s10661-010-1437-0

Das B, Talukdar J, Sarma S, et al (2003) Fluoride and other inorganic constituents in groundwater of Guwahati, Assam, India. Curr Sci 85:656–661.

Das KK, Panigrahi T, Panda RB (2012) Occurrence of fluoride in groundwater of Patripal panchayat in Balasore district, Odisha , India. J Environ 01:33–39.

Das N, Sarma KP, Patel AK, et al (2017) Seasonal disparity in the co-occurrence of arsenic and fluoride in the aquifers of the Brahmaputra flood plains, Northeast India. Environ Earth Sci 76:183. doi: 10.1007/s12665-017-6488-x

Dash JP, Sarangi A, Singh DK (2010) Spatial variability of groundwater depth and quality parameters in the national capital territory of Delhi. Environ Manage 45:640–650. doi: 10.1007/s00267-010-9436-z

Datta AS, Chakrabortty A, Dalal SS De, Lahiri SC (2014) Fluoride contamination of underground water in West Bengal, India. Fluoride 47:241–248.

Datta PS, Tyagi SK, Mookerjee P, et al (1999) Groundwater NO3 and F Contamination Processes in Pushkar Valley, Rajasthan as Reflected from 18O Isotopic Signature and 3H Recharge Studies. Environ Monit Assess 56:209–219. doi: 10.1023/A:1005903619718

Deki T (2013) Inadequate fluoride content in Bhutan’s waters a probable factor for tooth decay. The Bhutanese

Desai B, Desai H (2012) Assessment of water quality index for the ground water with respect to salt water intrusion at coastal region of Surat city, Gujarat , India. J Environ Res Dev 7:607–621.

Desbarats AJ (2009) On elevated fluoride and boron concentrations in groundwaters associated with the Lake Saint-Martin impact structure, Manitoba. Appl Geochemistry 24:915–927. doi: 10.1016/J.APGEOCHEM.2009.02.016

Devadas DJ, Rao NS, Rao BT, et al (2007) Hydrogeochemistry of the Sarada river basin, Visakhapatnam district, Andhra Pradesh, India. Environ Geol 52:1331–1342. doi: 10.1007/s00254-006-0577-6

Dey RK, Swain SK, Mishra S, et al (2012) Hydrogeochemical processes controlling the high fluoride concentration in groundwater: a case study at the Boden block area, Orissa, India. Environ Monit Assess 184:3279–3291. doi: 10.1007/s10661-011-2188-2

Dhankhar V, Singh D (2015) Ground water characteristics of Kurukshetra District : A Review. Krishi Sanskriti

Dharmagunawardhane HA, Dissanayake CB (2007) Fluoride Problems in Sri Lanka. Environ Manag Heal 4:9–16. doi: 10.1108/09566169310033422

Dhiman SD (2014) Groundwater quality assessment for irrigation use in Rajkot district, Gujarat. J Indian Water Resour Soc 34:34–39.

Dhiman SD, Keshari AK (2006) Hydrogeochemical evaluation of high-fluoride groundwaters: a case study from Mehsana District, Gujarat, India. Hydrol Sci J 51:1149–1162. doi: 10.1623/hysj.51.6.1149

Dubey MS, Deshpande SM, Gaikwad GD, Dongre A (2018) Fluoride contaminated groundwater from Warora area of Chandrapur district, central India: Groundwater geochemistry and comments on the source of fluoride. J Appl Geochemistry 20:123–132.

Duraiswami RA, Patankar U (2011) Occurrence of fluoride in the drinking water sources from Gad River Basin, Maharashtra. J Geol Soc India 77:167–174. doi: 10.1007/s12594-011-0020-9

El-Gohary F, Tawfik A, Mahmoud U (2010) Comparative study between chemical coagulation/precipitation (C/P) versus coagulation/dissolved air flotation (C/DAF) for pre-treatment of personal care products (PCPs) wastewater. Desalination 252:106–112. doi: 10.1016/j.desal.2009.10.016

Elmabrok FM (2015) Study of fluoride level in the ground water of Alagilat city, Libya: Correlation with physicochemical parameters. Int Res J Pharm 6:615–622. doi: 10.7897/2230-8407.069120

Fantong WY, Satake H, Ayonghe SN, et al (2010) Geochemical provenance and spatial distribution of fluoride in groundwater of Mayo Tsanaga River Basin, Far North Region, Cameroon: Implications for incidence of fluorosis and optimal consumption dose. Environ Geochem Health 32:147–163. doi: 10.1007/s10653-009-9271-4

Farooqi A, Masuda H, Kusakabe M, et al (2007) Distribution of highly arsenic and fluoride contaminated groundwater from east Punjab, Pakistan, and the controlling role of anthropogenic pollutants in the natural hydrological cycle. Geochem J 41:213–234. doi: 10.2343/geochemj.41.213

Fazlul Hoque AKM (2013) Fluoride levels in different drinking water sources in Bangladesh. Fluoride 36:38–44.

Forsman B (1974) Dental fluorosis and caries in high-fluoride districts in Sweden. Community Dent Oral Epidemiol 2:132–148. doi: 10.1111/j.1600-0528.1974.tb01671.x

Fuge R (1988) Sources of halogens in the environment, influences on human and animal health. Environ Geochem Health 10:51–61. doi: 10.1007/BF01758592

Garg VK, Suthar S, Singh S, et al (2009) Drinking water quality in villages of southwestern Haryana, India: assessing human health risks associated with hydrochemistry. Environ Geol 58:1329–1340. doi: 10.1007/s00254-008-1636-y

Garmes H, Persin F, Sandeaux J, et al (2002) Defluoridation of groundwater by a hybrid process combining adsorption and Donnan dialysis. Desalination 145:287–291. doi: 10.1016/S0011-9164(02)00424-1

Ghiglieri G, Pittalis D, Cerri G, Oggiano G (2012) Hydrogeology and hydrogeochemistry of an alkaline volcanic area: The NE Mt. Meru slope (East African Rift-Northern Tanzania). Hydrol. Earth Syst. Sci. 16:529–541.

Giri DK, Ghosh RC, Dey S, et al (2013) Incidence of hydrofluorosis and its adverse effects on animal health in Durg district, Chhattisgarh. Curr Sci 105:1477–1479. doi: 10.2307/24098846

Giridharan L, Venugopal T, Jayaprakash M (2008) Evaluation of the seasonal variation on the geochemical parameters and quality assessment of the groundwater in the proximity of River Cooum, Chennai, India. Environ Monit Assess 143:161–178. doi: 10.1007/s10661-007-9965-y

Gopalakrishnan SB, Viswanathan G, Siva Ilango S (2012) Prevalence of fluorosis and identification of fluoride endemic areas in Manur block of Tirunelveli District, Tamil Nadu, South India. Appl Water Sci 2:235–243. doi: 10.1007/s13201-012-0043-4

Gosselin DC, Headrick J, Harvey FE, et al (1999) Fluoride in Nebraska’s Ground Water. Groundw Monit Remediat 19:87–95. doi: 10.1111/j.1745-6592.1999.tb00209.x

Grimason A, Morse T, Beattie T, et al (2013) Classification and quality of groundwater supplies in the Lower Shire Valley, Malawi – Part 1: Physico-chemical quality of borehole water supplies in Chikhwawa, Malawi. Water South Africa 39:563–572. doi: 10.4314/wsa.v39i4.16

Grisak GE, Merritt WF, Williams DW (1977) A fluoride borehole dilution apparatus for groundwater velocity measurements. Can Geotech J 14:554–561. doi: 10.1139/t77-056

Gupta MK, Singh V, Rajwanshi P, et al (1999) Groundwater quality assessment of Tehsil Kheragarh, Agra (India) with special reference to fluoride. Environ Monit Assess 59:275–285. doi: 10.1023/A:1006117604763

Gupta R, Misra AK (2018) Groundwater quality analysis of quaternary aquifers in Jhajjar District, Haryana, India: Focus on groundwater fluoride and health implications. Alexandria Eng J 57:375–381. doi: 10.1016/J.AEJ.2016.08.031

Gupta S, Banerjee S, Saha R, et al (2006) Fluoride geochemistry of groundwater in nalhati - 1 block of the Birbhum district , West Bengal , India. Fluoride 39:318–320.

Haritash AK, Kaushik CP, Kaushik A, et al (2008) Suitability assessment of groundwater for drinking, irrigation and industrial use in some North Indian villages. Environ Monit Assess 145:397–406. doi: 10.1007/s10661-007-0048-x

Heikens A, Sumarti S, Van Bergen M, et al (2005) The impact of the hyperacid Ijen Crater Lake: Risks of excess fluoride to human health. Sci Total Environ 346:56–69. doi: 10.1016/j.scitotenv.2004.12.007

Hillier S, Cooper C, Kellingray S, et al (2000) Fluoride in drinking water and risk of hip fracture in the UK: a case-control study. Lancet 355:265–269. doi: 10.1016/S0140-6736(99)07161-5

Hiremath SC, Yadawe MS, Pujeri US, Hiremath DM (2011) Physico-Chemical Analysis of Ground Water in Municipal Area of Bijapur (Karnataka). Curr World Environ 6:265–269.

Howard KW., Beck PJ (1993) Hydrogeochemical implications of groundwater contamination by road de-icing chemicals. J Contam Hydrol 12:245–268. doi: 10.1016/0169-7722(93)90010-P

Huew R, Waterhouse PJ, Moynihan PJ, et al (2011) Dental erosion and its association with diet in Libyan schoolchildren. Eur Arch Paediatr Dent 12:234–240. doi: 10.1007/BF03262814

Hussain I, Arif M, Hussain J (2012) Fluoride contamination in drinking water in rural habitations of Central Rajasthan, India. Environ Monit Assess 184:5151–5158. doi: 10.1007/s10661-011-2329-7

Hussein MT (2004) Hydrochemical evaluation of groundwater in the Blue Nile Basin, eastern Sudan, using conventional and multivariate techniques. Hydrogeol J 12:144–158. doi: 10.1007/s10040-003-0265-5

Ibrahim Y, Affan AA, Bjorvatn K, Sudan N (1995a) Fluoride and fluorosis in the Sudan. In: Dahi E, Breghoj H (eds) 1st International workshop on fluorosis prevention and defluoridation of water. CDC Ngurdoto, Tanzania, pp 29–32

Ibrahim YE, Affan AA, Bjorvatn K (1995b) Prevalence of dental fluorosis in Sudanese children from two villages with 0.25 and 2.56 ppm fluoride in the drinking water. Int J Paediatr Dent 5:223–229. doi: 10.1111/j.1365-263X.1995.tb00183.x

Ilangeswaran D, Kumar R, Kannan D (2009) Assessment of quality of groundwater in Kandarvakottai and Karambakudi areas of Pudukkottai district, Tamilnadu, India. E-Journal Chem 6:898–904. doi: 10.1155/2009/628719

Indermitte E, Saava A, Karro E (2009) Exposure to high fluoride drinking water and risk of dental fluorosis in Estonia. Int J Environ Res Public Health 6:710–721. doi: 10.3390/ijerph6020710

Irvine K, Murphy TP, Sampson M, et al (2006) An overview of water Quality Issues in Cambodia. J Water Manag Model 14:225–227. doi: 10.14796/JWMM.R225-02

Jagadeshan G, Kalpana L, Elango L (2015) Hydrogeochemistry of high fluoride groundwater in hard rock aquifer in a part of Dharmapuri district, Tamil Nadu, India. Geochemistry Int 53:554–564. doi: 10.1134/S0016702915060038

Jain CK, Bandyopadhyay A, Bhadra A (2010) Assessment of ground water quality for drinking purpose, District Nainital, Uttarakhand, India. Environ Monit Assess 166:663–676. doi: 10.1007/s10661-009-1031-5

Jayaprakash M, Giridharan L, Venugopal T, et al (2008) Characterization and evaluation of the factors affecting the geochemistry of groundwater in Neyveli, Tamil Nadu, India. Environ Geol 54:855–867. doi: 10.1007/s00254-007-0868-6

Jayawardana DT, Pitawala HMTGA, Ishiga H (2012) Geochemical assessment of soils in districts of fluoride-rich and fluoride-poor groundwater, north-central Sri Lanka. J Geochemical Explor 114:118–125. doi: 10.1016/J.GEXPLO.2012.01.004

Jha PK, Tiwari J, Singh UK, et al (2009a) Chemical weathering and associated CO2 consumption in the Godavari river basin, India. Chem Geol 264:364–374. doi: 10.1016/J.CHEMGEO.2009.03.025

Jha SK, Nayak AK, Sharma YK (2009b) Fluoride occurrence and assessment of exposure dose of fluoride in shallow aquifers of Makur, Unnao district Uttar Pradesh, India. Environ Monit Assess 156:561–566. doi: 10.1007/s10661-008-0505-1

Jha SK, Nayak AK, Sharma YK (2010) Potential fluoride contamination in the drinking water of Marks Nagar, Unnao district, Uttar Pradesh, India. Environ Geochem Health 32:217–226. doi: 10.1007/s10653-009-9277-y

Kagambega N, Galvez R (2014) Acid mine drainage and heavy metals contamination of surface water and soil in southwest Burkina Faso-West Africa 3:2.

Kanaujia S, Singh B, Singh SK (2013) Mapping of Fluoride Endemic Areas in Rae Bareli District, Uttar Pradesh, India. Chem Sci Trans 2:1411–1417. doi: 10.7598/cst2013.539

Kantharaja DC, Lakkundi TK, Basavanna M, Manjappa S (2012) Spatial analysis of fluoride concentration in groundwaters of Shivani watershed area, Karnataka state, South India, through geospatial information system. Environ Earth Sci 65:67–76. doi: 10.1007/s12665-011-1065-1

Karapanos E, Katsanou K, Karli A, Lambrakis N (2011) Evaluation of the geochemical conditions in the deep aquifer system in Vounargo area (SW Greece) based on hydrochemical data. In: Advances in the Research of Aquatic Environment. Springer Berlin Heidelberg, Berlin, Heidelberg, pp 201–209

Karthikeyan K, Nanthakumar K, Velmurugan P, et al (2010) Prevalence of certain inorganic constituents in groundwater samples of Erode district, Tamilnadu, India, with special emphasis on fluoride, fluorosis and its remedial measures. Environ Monit Assess 160:141–155. doi: 10.1007/s10661-008-0664-0

Kazi TG, Arain MB, Baig JA, et al (2009) The correlation of arsenic levels in drinking water with the biological samples of skin disorders. Sci Total Environ 407:1019–1026. doi: 10.1016/J.SCITOTENV.2008.10.013

Kelman RB, Denenberg VH (2014) Assessment of groundwater quality in wells within the Bombali district, Sierra Leone. Anim Res Int. 11: 1905-1916doi: 10.1126/science.131.3396.263

Keramati H, Miri A, Baghaei M, et al (2018) Fluoride in Iranian drinking water resources: A systematic review, meta-analysis and non-carcinogenic risk assessment. Biol Trace Elem Res 1–13. doi: 10.1007/s12011-018-1418-7

Ketata M, Hamzaoui F, Gueddari M, et al (2011) Hydrochemical and statistical study of groundwaters in Gabes-south deep aquifer (south-eastern Tunisia). Phys Chem Earth 36:187–196. doi: 10.1016/j.pce.2010.02.006

Khan R, Jhariya DC (2017) Groundwater quality assessment for drinking purpose in Raipur city, Chhattisgarh using water quality index and geographic information system. J Geol Soc India 90:69–76. doi: 10.1007/s12594-017-0665-0

Khanna P (2015) Physico-chemical Parameters of Groundwater of Bishnah, District Jammu, Jammu and Kashmir, India. Proc Natl Acad Sci India Sect B Biol Sci 85:121–130. doi: 10.1007/s40011-014-0345-4

KheradPisheh Z, Ehrampoush MH, Montazeri A, et al (2016) Fluoride in drinking water in 31 provinces of Iran. Expo Heal 8:465–474. doi: 10.1007/s12403-016-0204-z

Kim Y, Kim JY, Kim K (2011) Geochemical characteristics of fluoride in groundwater of Gimcheon, Korea: Lithogenic and agricultural origins. Environ Earth Sci 63:1139–1148. doi: 10.1007/s12665-010-0789-7

Kotoky P, Barooah PK, Baruah MK, et al (2008) Fluoride and endemic fluorosis in the Karbianglong district, Assam, India. Fluoride 41:72–75.

Kruse E, Ainchil J (2003) Fluoride variations in groundwater of an area in Buenos Aires Province, Argentina. Environ Geol 44:86–89. doi: 10.1007/s00254-002-0702-0

Kukillaya JP, Narayanan T (2014) Role of weathering of ferromagnesian minerals and surface water irrigation in evolving and modifying chemistry of groundwater in Palakkad district, Kerala, with special reference to its fluoride content. J Geol Soc India 84:579–589. doi: 10.1007/s12594-014-0165-4

Kumar E, Bhatnagar A, Kumar U, Sillanpää M (2011) Defluoridation from aqueous solutions by nano-alumina: Characterization and sorption studies. J Hazard Mater 186:1042–1049. doi: 10.1016/j.jhazmat.2010.11.102

Kumar M, Das A, Das N, et al (2016) Co-occurrence perspective of arsenic and fluoride in the groundwater of Diphu, Assam, Northeastern India. Chemosphere 150:227–238. doi: 10.1016/j.chemosphere.2016.02.019

Kumar M, Kumari K, Ramanathan A, Saxena R (2007) A comparative evaluation of groundwater suitability for irrigation and drinking purposes in two intensively cultivated districts of Punjab, India. Environ Geol 53:553–574. doi: 10.1007/s00254-007-0672-3

Kumar M, Ramanathan A, Rao MS, Kumar B (2006) Identification and evaluation of hydrogeochemical processes in the groundwater environment of Delhi, India. Environ Geol 50:1025–1039. doi: 10.1007/s00254-006-0275-4

Kumar MS, Dhakate R, Yadagiri G, Reddy KS (2017) Principal component and multivariate statistical approach for evaluation of hydrochemical characterization of fluoride-rich groundwater of Shaslar Vagu watershed, Nalgonda District, India. Arab J Geosci 10:83. doi: 10.1007/s12517-017-2863-x

Kumar PJS, Jegathambal P, James EJ (2014) Factors influencing the high fluoride concentration in groundwater of Vellore District, South India. Environ Earth Sci 72:2437–2446. doi: 10.1007/s12665-014-3152-6

Kundu MC, Mandal B (2009) Assessment of potential hazards of fluoride contamination in drinking groundwater of an intensively cultivated district in West Bengal, India. Environ Monit Assess 152:97–103. doi: 10.1007/s10661-008-0299-1

Kundu N, Panigrahi MK, Tripathy S, et al (2001) Geochemical appraisal of fluoride contamination of groundwater in the Nayagarh District of Orissa, India. Environ Geol 41:451–460. doi: 10.1007/s002540100414

Künzel W, Fischer T (2000) Caries prevalence after cessation of water fluoridation in La Salud, Cuba. Caries Res 34:20–5. doi: 10.1159/000016565

Kut KMK, Sarswat A, Srivastava A, et al (2016) A review of fluoride in african groundwater and local remediation methods. Groundw Sustain Dev 2–3:190–212. doi: 10.1016/j.gsd.2016.09.001

Lahermo P, Sandström H, Malisa E (1991) The occurrence and geochemistry of fluorides in natural waters in Finland and East Africa with reference to their geomedical implications. J Geochemical Explor 41:65–79. doi: 10.1016/0375-6742(91)90075-6

Lakshmi DV, Rao KJ, Ramprakash T, et al (2017) Geochemistry of Ground Water with Special Emphasis on Fluoride and its Seasonal Variations in Parts of Nalgonda District, Telangana State, India. IntJCurrMicrobiolAppSci 6:1042–1050. doi: 10.20546/ijcmas.2017.605.113

Larsen MJ, Fejerskov O, Bojen O, et al (1989) Fluctuation of fluoride concentrations in drinking waters: a collaborative study. Int Dent J 39:140–6.

Latha SS, Ambika SR, Prasad SJ (1999) Fluoride contamination status of groundwater in Karnataka. Curr Sci 76:730–734. doi: 10.2307/24101056

Laurent M, Marie MJ (2010) Groundwater quality of Southeastern Brazzaville, Congo. E-Journal Chem 7:861–869. doi: 10.1155/2010/376107

Lincir I, Rosin-Grget K (1993) Caries-preventive effect of two different topical fluoride concentrations with two different frequencies of application in preschool children. Caries Res 27:484–7. doi: 10.1159/000261585

Loh T (1996) Thirty-eight years of water fluoridation--the Singapore scenario. Community Dent Health 13 Suppl 2:47–50.

Luna LC, Melián MG (2003) Fluoride in drinking water in Cuba and its association with geological and geographical variables. Rev Panam salud publica 14:341–349. doi: 10.1590/S1020-49892003001000009

Malana MA, Khosa MA (2011) Groundwater pollution with special focus on arsenic, Dera Ghazi Khan-Pakistan. J Saudi Chem Soc 15:39–47. doi: 10.1016/J.JSCS.2010.09.009

Mamatha P, Rao SM (2010) Geochemistry of fluoride rich groundwater in Kolar and Tumkur Districts of Karnataka. Environ Earth Sci 61:131–142. doi: 10.1007/s12665-009-0331-y

Mamuse A, Watkins R (2016) High fluoride drinking water in Gokwe, northwest Zimbabwe.

Mandinic Z, Curcic M, Antonijevic B, et al (2010) Fluoride in drinking water and dental fluorosis. Sci Total Environ 408:3507–3512. doi: 10.1016/J.SCITOTENV.2010.04.029

Manikandan S, Chidambaram S, Ramanathan A, et al (2014) A study on the high fluoride concentration in the magnesium-rich waters of hard rock aquifer in Krishnagiri district, Tamilnadu, India. Arab J Geosci 7:273–285. doi: 10.1007/s12517-012-0752-x

Manjappa S, Basavarajappa BE, Desai GP, et al (2003) Nitrate and fluoride levels in ground waters of davanagere taluka in Karnataka. Indian J Environ Health 45:155–160.

Manyatsi A, Brown R (2009) IWRM survey and status report: Swaziland.

Martins VT d. S, Pino DS, Bertolo R, et al (2018) Who to blame for groundwater fluoride anomaly in São Paulo, Brazil? Hydrogeochemistry and isotopic evidence. Appl Geochemistry 90:25–38. doi: 10.1016/J.APGEOCHEM.2017.12.020

Mazumdar N, Sharma BB, Choudhury BN (2015) A study on the fluoride concentration in groundwater of selected locations of assam, india. J Assam Sci Soc 56:75–87.

MDWS (2018) Water quality monitoring and surveillance, National Rural Drinking Water Programme, Ministry of Drinking Water & Sanitation.

Meenakshi, Garg V., Kavita, et al (2004) Groundwater quality in some villages of Haryana, India: focus on fluoride and fluorosis. J Hazard Mater 106:85–97. doi: 10.1016/J.JHAZMAT.2003.09.007

Messaïtfa A (2008) Fluoride contents in groundwaters and the main consumed foods (dates and tea) in Southern Algeria region. Environ Geol 55:377–383. doi: 10.1007/s00254-007-0983-4

Mishra D, Mudgal M, Khan MA, et al (2009) Assessment of ground water quality of Bhavnagar region (Gujarat). J Sci Ind Res (India) 68:964–966.

Misra AK, Mishra A (2007a) Escalation of salinity levels in the quaternary aquifers of the Ganga alluvial plain, India. Environ Geol 53:47–56. doi: 10.1007/s00254-006-0617-2

Misra AK, Mishra A (2007b) Study of quaternary aquifers in Ganga Plain, India: Focus on groundwater salinity, fluoride and fluorosis. J Hazard Mater 144:438–448. doi: 10.1016/J.JHAZMAT.2006.10.057

Mohamed AAJ, Rahman IA, Lim LH (2014) Groundwater quality assessment in the urban-west region of Zanzibar Island. Environ Monit Assess 186:6287–6300. doi: 10.1007/s10661-014-3854-y

Mondal D, Dutta G, Gupta S (2016) Inferring the fluoride hydrogeochemistry and effect of consuming fluoride-contaminated drinking water on human health in some endemic areas of Birbhum district, West Bengal. Environ Geochem Health 38:557–576. doi: 10.1007/s10653-015-9743-7

Mondal NC, Prasad RK, Saxena VK, et al (2009) Appraisal of highly fluoride zones in groundwater of Kurmapalli watershed, Nalgonda district, Andhra Pradesh (India). Environ Earth Sci 59:63–73. doi: 10.1007/s12665-009-0004-x

Mondal P, George S (2015) A review on adsorbents used for defluoridation of drinking water. Rev. Environ. Sci. Biotechnol. 14:195–210.

Mor S, Singh S, Yadav P, et al (2009) Appraisal of salinity and fluoride in a semi-arid region of India using statistical and multivariate techniques. Environ Geochem Health 31:643–655. doi: 10.1007/s10653-008-9222-5

Mudgal K, Kumari M, Sharma D, Mudgal K dev (2015) Hydrochemical Analysis of Drinking Water Quality of Alwar District , Rajasthan. Nat Sci 7:30–39.

Nagaraju A, Thejaswi A, Aitkenhead-Peterson JA (2017) Fluoride and heavy metal accumulation by vegetation in the fluoride affected area of Talupula, Anantapur district, Andhra Pradesh. J Geol Soc India 89:27–32. doi: 10.1007/s12594-017-0555-5

Nair GA, Bohjuari JA, Al-Mariami MA, et al (2006) Groundwater quality of north-east Libya. J Environ Biol 27:695–700.

Narsimha A, Sudarshan V (2017a) Contamination of fluoride in groundwater and its effect on human health: a case study in hard rock aquifers of Siddipet, Telangana State, India. Appl Water Sci 7:2501–2512. doi: 10.1007/s13201-016-0441-0

Narsimha A, Sudarshan V (2017b) Assessment of fluoride contamination in groundwater from Basara, Adilabad District, Telangana State, India. Appl Water Sci 7:2717–2725. doi: 10.1007/s13201-016-0489-x

Narsimha A, Sudarshan V (2018) Data on fluoride concentration levels in semi-arid region of Medak, Telangana, South India. Data Br 16:717–723. doi: 10.1016/j.dib.2017.11.089

Naseem S, Rafique T, Bashir E, et al (2010) Lithological influences on occurrence of high-fluoride groundwater in Nagar Parkar area, Thar Desert, Pakistan. Chemosphere 78:1313–1321. doi: 10.1016/J.CHEMOSPHERE.2010.01.010

Nasr AM, Moheb DM, Masry ES El (2014) Prevalence of dental caries in child school from two Libya’s western cities with different levels of fluoride in their drinking Water 12:28-34.

Nasr A Ben, Walha K, Charcosset C, Ben Amar R (2011) Removal of fluoride ions using cuttlefish bones. J Fluor Chem 132:57–62. doi: 10.1016/j.jfluchem.2010.11.006

Nicolli HB, Bundschuh J, Blanco M del C, et al (2012) Arsenic and associated trace-elements in groundwater from the Chaco-Pampean plain, Argentina: Results from 100 years of research. Sci Total Environ 429:36–56. doi: 10.1016/J.SCITOTENV.2012.04.048

Nsengimana H, Masengesho F, Nyirimbibi DK (2012) Some physico-chemical characteristics of ground water in Rwanda. Rwanda J 25:101–109. doi: 10.4314/rj.v25i1.7

Oinam JD, Ramanathan A, Singh G (2012) Geochemical and statistical evaluation of groundwater in Imphal and Thoubal district of Manipur, India. J Asian Earth Sci 48:136–149. doi: 10.1016/J.JSEAES.2011.11.017

Ortiz D, Castro LE de, Turrubiartes F, et al (1998) Assessment of the exposure to fluoride from drinking water in Durango , Mexico , using a geographic information system. Fluoride 31:183–187.

Osemwegie I, Mairie-Solange Oga Y, Ernest Ahoussi K, et al (2013) Influence of anthropogenic activities of groundwater from hand dug wells within the precarious settlements of southern Abidjan, Côte d’Ivoire: case of the slums of Anoumabo (Marcory) and Adjouffou (Port-Bouët). J Water Resour Prot 5:427–439. doi: 10.4236/jwarp.2013.54042

Pandith M, Kaplay R., Potdar SS, et al (2017) Impact of urbanization coupled with drought situations on groundwater quality in shallow (basalt) and deeper (granite) aquifers with special reference to fluoride in Nanded-Waghala Municipal Corporation, Nanded District, Maharashtra (India). Environ Monit Assess 189:428. doi: 10.1007/s10661-017-6098-9

Pandith M, Malpe DB, Rao AD, Rao PN (2016) Aquifer wise seasonal variations and spatial distribution of major ions with focus on fluoride contamination-Pandharkawada block, Yavatmal district, Maharashtra, India. Environ Monit Assess 188:72. doi: 10.1007/s10661-015-5027-z

Paoloni JD, Fiorentino CE, Sequeira ME (2003) Fluoride contamination of aquifers in the southeast subhumid pampa, Argentina. Environ Toxicol 18:317–320. doi: 10.1002/tox.10131

Patel KS, Sahu BL, Dahariya NS, et al (2017) Groundwater arsenic and fluoride in Rajnandgaon District, Chhattisgarh, northeastern India. Appl Water Sci 7:1817–1826. doi: 10.1007/s13201-015-0355-2

Patel SC, Khalkho R, Patel SK, et al (2014) Fluoride contamination of groundwater in parts of eastern India and a preliminary experimental study of fluoride adsorption by natural haematite iron ore and synthetic magnetite. Environ Earth Sci 72:2033–2049. doi: 10.1007/s12665-014-3112-1

Patil DA, Deshmukh PK, Fursule RA, Patil PO (2010) Geochemical studies of fluoride and other water quality parameters of ground water in Dhule region Maharashtra, India. J Nat Sci Biol Med 1:9–11. doi: 10.4103/0976-9668.71665

Pérez ES, Sanz J (1999) Fluoride concentration in drinking water in the province of Soria (Central Spain) and caries in children. Environ Geochem Health 21:133–140. doi: 10.1023/A:1006658607500

Periakali P, Subramanian S, Eswaramoorthi S, et al (2001) Distribution of fluoride in the ground water of Salem and Namakkal districts, Tamil Nadu. J Appl Geochemistry 3:120–132.

Prakash KL, Somashekar RK (2006) Groundwater quality--assessment on Anekal Taluk, Bangalore Urban district, India. J Environ Biol 27:633–7.

Pritchard M, Mkandawire T, O’Neill JG (2008) Assessment of groundwater quality in shallow wells within the southern districts of Malawi. Phys Chem Earth, Parts A/B/C 33:812–823. doi: 10.1016/J.PCE.2008.06.036

Queste A, Lacombe M, Hellmeier W, et al (2001) High concentrations of fluoride and boron in drinking water wells in the Muenster region - Results of a preliminary investigation. Int J Hyg Environ Health 203:221–224. doi: 10.1078/S1438-4639(04)70032-2

Rafique T, Naseem S, Bhanger MI, Usmani TH (2008) Fluoride ion contamination in the groundwater of Mithi sub-district, the Thar Desert, Pakistan. Environ Geol 56:317–326. doi: 10.1007/s00254-007-1167-y

Rahim ZHA, Bakri MM, Zakir HM, et al (2014) High fluoride and low pH level have been detected in popular flavoured beverages in Malaysia. Pakistan J Med Sci 30:404–408. doi: 10.12669/pjms.302.4413

Rahman N, Nasir M (2017) Development of Zr(IV)—Doped polypyrrole/zirconium (IV) iodate composite for efficient removal of fluoride from water environment. J Water Process Eng 19:172–184. doi: 10.1016/J.JWPE.2017.07.016

Raju NJ, Dey S, Das K (2009a) Fluoride contamination in groundwaters of Sonbhadra District, Uttar Pradesh, India. Curr Sci 96:979–985. doi: 10.2307/24104691

Raju NJ, Dey S, Gossel W, Wycisk P (2012) Fluoride hazard and assessment of groundwater quality in the semi-arid Upper Panda River basin, Sonbhadra district, Uttar Pradesh, India. Hydrol Sci J 57:1433–1452. doi: 10.1080/02626667.2012.715748

Raju NJ, Ram P, Dey S (2009b) Groundwater quality in the lower Varuna River basin, Varanasi district, Uttar Pradesh. J Geol Soc India 73:178–192. doi: 10.1007/s12594-009-0074-0

Ramesh B, Kavitha B (2016) Estimation of Fluoride Concentration in Groundwater in some Villages of Jammikunta Mandal, Karimnagar District, Telangana, India. Int J Eng Invent 5:2278–7461.

Ramesh K, Elango L (2012) Groundwater quality and its suitability for domestic and agricultural use in Tondiar river basin, Tamil Nadu, India. Environ Monit Assess 184:3887–3899. doi: 10.1007/s10661-011-2231-3

Rango T, Kravchenko J, Atlaw B, et al (2012) Groundwater quality and its health impact: An assessment of dental fluorosis in rural inhabitants of the Main Ethiopian Rift. Environ Int 43:37–47. doi: 10.1016/j.envint.2012.03.002

Rao NS (2009) Fluoride in groundwater, Varaha River Basin, Visakhapatnam District, Andhra Pradesh, India. Environ Monit Assess 152:47–60. doi: 10.1007/s10661-008-0295-5

Rao NS (1997) The occurrence and behaviour of fluoride in the groundwater of the Lower Vamsadhara River basin, India. Hydrol Sci J 42:877–892.

Rao NS, Devadas DJ (2003) Fluoride incidence in groundwater in an area of Peninsular India. Environ Geol 45:243–251. doi: 10.1007/s00254-003-0873-3

Rao NS, Marghade D, Dinakar A, et al (2017a) Geochemical characteristics and controlling factors of chemical composition of groundwater in a part of Guntur district, Andhra Pradesh, India. Environ Earth Sci 76:747. doi: 10.1007/s12665-017-7093-8

Rao NS, Rao PS, Dinakar A, et al (2017b) Fluoride occurrence in the groundwater in a coastal region of Andhra Pradesh, India. Appl Water Sci 7:1467–1478. doi: 10.1007/s13201-015-0338-3

Rao NS, Subrahmanyam A, Rao GB (2013) Fluoride-bearing groundwater in Gummanampadu Sub-basin, Guntur District, Andhra Pradesh, India. Environ Earth Sci 70:575–586. doi: 10.1007/s12665-012-2142-9

Rao PN, Rao AD, Bhargav JS, et al (2014) Regional appraisal of the fluoride occurrence in groundwaters of Andhra Pradesh. J Geol Soc India 84:483–493. doi: 10.1007/s12594-014-0154-7

Rasool A, Farooqi A, Xiao T, et al (2018) A review of global outlook on fluoride contamination in groundwater with prominence on the Pakistan current situation. Environ Geochem Health 40:1265–1281. doi: 10.1007/s10653-017-0054-z

Rasool A, Xiao T, Baig ZT, et al (2015) Co-occurrence of arsenic and fluoride in the groundwater of Punjab, Pakistan: source discrimination and health risk assessment. Environ Sci Pollut Res 22:19729–19746. doi: 10.1007/s11356-015-5159-2

Ravikumar P, Somashekar RK, Angami M (2011) Hydrochemistry and evaluation of groundwater suitability for irrigation and drinking purposes in the Markandeya River basin, Belgaum District, Karnataka State, India. Environ Monit Assess 173:459–487. doi: 10.1007/s10661-010-1399-2

Ravindra K, Garg VK (2006) Distribution of fluoride in groundwater and its suitability assessment for drinking purpose. Int J Environ Health Res 16:163–166. doi: 10.1080/09603120500538283

Ray D, Ravindar Rao R, Bhoi A V., et al (2000) Physico-Chemical Quality of Drinking Water in Rohtas District of Bihar. Environ Monit Assess 61:387–398. doi: 10.1023/A:1006165615097

Razdan P, Patthi B, Kumar JK, et al (2017) Effect of Fluoride Concentration in Drinking Water on Intelligence Quotient of 12-14-Year-Old Children in Mathura District: A Cross-Sectional Study. J Int Soc Prev Community Dent 7:252–258. doi: 10.4103/jispcd.JISPCD_201_17

Razo LM Del, Corona JC, García-Vargas G, et al (1993) Fluoride levels in well-water from a chronic arsenicism area of Northern Mexico. Environ Pollut 80:91–94. doi: 10.1016/0269-7491(93)90015-G

Reddy BM, Sunitha V, Reddy MR (2015) Geospatial analysis of fluoride contamination in groundwater of southeastern part of Anantapur district, Andhra Pradesh. In: Management of Natural Resources in a Changing Environment. Springer International Publishing, Cham, pp 61–74

Reddy DV, Nagabhushanam P, Sukhija BS, et al (2010) Fluoride dynamics in the granitic aquifer of the Wailapally watershed, Nalgonda District, India. Chem Geol 269:278–289. doi: 10.1016/J.CHEMGEO.2009.10.003

Reimann C, Hall GEM, Siewers U, et al (1996) Radon, fluoride and 62 elements as determined by ICP-MS in 145 Norwegian hard rock groundwater samples. Sci Total Environ 192:1–19. doi: 10.1016/0048-9697(96)05272-2

Reyes-Gómez VM, Alarcón-Herrera MT, Gutiérrez M, López DN (2015) Arsenic and fluoride variations in groundwater of an Endorheic basin undergoing land-use changes. Arch Environ Contam Toxicol 68:292–304. doi: 10.1007/s00244-014-0082-y

Reza R, Singh G (2013) Groundwater quality status with respect to fluoride contamination in industrial area of Angul district Orissa India. Ind J Sci Res Tech 1:54–61.

Riordan PJ, Banks JA (1991) Dental fluorosis and fluoride exposure in Western Australia. J Dent Res 70:1022–1028. doi: 10.1177/00220345910700070101

Rosin-Grget K, Lincir I (1995) Anticaries effect of different amine fluoride concentrations in schoolchildren. Caries Res 29:168–71. doi: 10.1159/000262064

Rwenyonyi C, Bjorvatn K, Birkeland J, Haugejorden O (1999) Altitude as a risk indicator of dental fluorosis in children residing in areas with 0.5 and 2.5 mg fluoride per litre in drinking water. Caries Res 33:267–74. doi: 10.1159/000016528

Rwenyonyi CM, Birkeland JM, Haugejorden O, Bjorvatn K (2000) Age as a determinant of severity of dental fluorosis in children residing in areas with 0.5 and 2.5 mg fluoride per liter in drinking water. Clin Oral Investig 4:157–61. doi: 10.1007/s007840000040157.784

Sabone TG (1994) Drinking water quality in the Gantsi District of Botswana. Int J Environ Health Res 4:141–146. doi: 10.1080/09603129409356811

Saini R (2017) Groundwater in Mahendragarh villages not fit for consumption. The Tribune 3rd July, Haryana.

Sajidu, S. M. I, Masamba, W. R. L, Thole B, Mwatseteza F (2008) Groundwater fluoride levels in villages of Southern Malawi and removal studies using bauxite. Int J Phys Sci 3:1–11.

Sajidu S, Kayira C, Masamba W, Mwatseteza J (2012) Defluoridation of groundwater using raw bauxite: Rural domestic defluoridation technology. Environ Nat Resour Res 2:p1. doi: 10.5539/enrr.v2n3p1

Salifu A, Petrusevski B, Ghebremichael K, et al (2012) Multivariate statistical analysis for fluoride occurrence in groundwater in the Northern region of Ghana. J Contam Hydrol 140–141:34–44. doi: 10.1016/J.JCONHYD.2012.08.002

Salim LHM, Elhassan BM, Elawad MA (2014) Physicochemical analysis of surface and groundwater in Karrary locality , Sudan. Int J Sci Eng Technol Res 3:436–438.

Salve PR, Maurya A, Kumbhare PS, et al (2008) Assessment of Groundwater Quality with Respect to Fluoride. Bull Environ Contam Toxicol 81:289–293. doi: 10.1007/s00128-008-9466-x

Sankararamakrishnan N, Sharma AK, Iyengar L (2008) Contamination of nitrate and fluoride in ground water along the Ganges Alluvial Plain of Kanpur district, Uttar Pradesh, India. Environ Monit Assess 146:375–382. doi: 10.1007/s10661-007-0085-5

Saxena VK, Ahmed S (2003) Inferring the chemical parameters for the dissolution of fluoride in groundwater. Environ Geol 43:731–736. doi: 10.1007/s00254-002-0672-2

Schneider S, Christe K (1998) Fluorine. Encyclopedia Britannica. https://www.britannica.com/science/fluorine

Segreto VA, Collins EM, Camann D, Smith CT (1984) A current study of mottled enamel in Texas. J Am Dent Assoc 108:56–59. doi: 10.14219/jada.archive.1984.0197

Sehn P (2008) Fluoride removal with extra low energy reverse osmosis membranes: Three years of large scale field experience in Finland. Desalination 223:73–84. doi: 10.1016/j.desal.2007.02.077

Senior LA, Sloto RA (2006) Arsenic, boron, and fluoride concentrations in ground water in and near diabase intrusions, Newark basin, southeastern Pennsylvania. P117

Shah MT, Danishwar S (2003) Potential fluoride contamination in the drinking water of Naranji area, NorthWest Frontier Province, Pakistan. Environ Geochem Health 25:475–481. doi: 10.1023/B:EGAH.0000004579.54947.e7

Shaji E, Viju J, Thambi DS (2007) High fluoride in groundwater of Palghat District, Kerala. Curr Sci 92:240–245.

Shanthi M, Reddy BV, Venkataramana V, et al (2014) Relationship Between Drinking Water Fluoride Levels, Dental Fluorosis, Dental Caries and Associated Risk Factors in 9-12 Years Old School Children of Nelakondapally Mandal of Khammam District, Andhra Pradesh, India: A Cross-sectional Survey. J Int oral Heal JIOH 6:106–10.

Shekhar S, Sarkar A (2013) Hydrogeological characterization and assessment of groundwater quality in shallow aquifers in vicinity of Najafgarh drain of NCT Delhi. J Earth Syst Sci 122:43–54. doi: 10.1007/s12040-012-0256-9

Shivashankara AR, Shivaraja Shankara YM, Hanumanth Rao S, Gopalakrishna Bhat P (2000) A clinical and biochemical study of chronic fluoride toxicity in children of Kheru Thanda of Gulbarga district, Karnataka, India. Fluoride 33:66–73.

Silliman SE, Boukari M, Crane P, et al (2007) Observations on elemental concentrations of groundwater in central Benin. J Hydrol 335:374–388. doi: 10.1016/J.JHYDROL.2006.12.005

Singaraja C, Chidambaram S, Anandhan P, et al (2014) Geochemical evaluation of fluoride contamination of groundwater in the Thoothukudi District of Tamilnadu, India. Appl Water Sci 4:241–250. doi: 10.1007/s13201-014-0157-y

Singh AK, Mondal GC, Kumar S, et al (2008) Major ion chemistry, weathering processes and water quality assessment in upper catchment of Damodar River basin, India. Environ Geol 54:745–758. doi: 10.1007/s00254-007-0860-1

Singh B, Gaur S, Garg VK (2007) Fluoride in drinking water and human urine in Southern Haryana, India. J Hazard Mater 144:147–151. doi: 10.1016/J.JHAZMAT.2006.10.010

Singh CK, Rina K, Singh RP, et al (2011) Geochemical Modeling of High Fluoride Concentration in Groundwater of Pokhran Area of Rajasthan, India. Bull Environ Contam Toxicol 86:152–158. doi: 10.1007/s00128-011-0192-4

Singh NK, Kadam DS (2007) A study of fluoride in ground water of Karera block (Shivpuri, MP). Curr World Environ 2:97–98.

Sivasankar V, Ramachandramoorthy T, Chandramohan A (2013) Deterioration of coastal groundwater quality in Island and mainland regions of Ramanathapuram District, Southern India. Environ Monit Assess 185:931–944. doi: 10.1007/s10661-012-2604-2

Sreedevi PD, Ahmed S, Made B, et al (2006) Association of hydrogeological factors in temporal variations of fluoride concentration in a crystalline aquifer in India. Environ Geol 50:1–11. doi: 10.1007/s00254-005-0167-z

Srikanth R, Viswanatham KS, Kahsai F, et al (2002) Fluoride in groundwater in selected villages in Eritrea (north east Africa). Environ Monit Assess 75:169–177. doi: 10.1023/A:1014491915537

Srinivasamoorthy K, Vijayaraghavan K, Vasanthavigar M, et al (2012) Assessment of groundwater quality with special emphasis on fluoride contamination in crystalline bed rock aquifers of Mettur region, Tamilnadu, India. Arab J Geosci 5:83–94. doi: 10.1007/s12517-010-0162-x

Sudarshan V, Narsimha A, Das SVG (2018) Geochemical behavior of fluoride-rich groundwater in Markapur, Andhra Pradesh, South India. Data Br 18:87–95. doi: 10.1016/J.DIB.2018.02.084

Sujatha D (2003) Fluoride levels in the groundwater of the south-eastern part of Ranga Reddy district, Andhra Pradesh, India. Environ Geol 44:587–591. doi: 10.1007/s00254-003-0795-0

Suthar S, Garg VK, Jangir S, et al (2008) Fluoride contamination in drinking water in rural habitations of Northern Rajasthan, India. Environ Monit Assess 145:1–6. doi: 10.1007/s10661-007-0011-x

Tanouayi G, Gnandi K, Ouro-sama K, et al (2016) Distribution of fluoride in the phosphorite mining area of Hahotoe – Kpogame ( Togo ). J Heal Pollut 6:84–94. doi: 10.5696/2156-9614-6.10.84

Thakur JK, Diwakar J, Singh SK (2015) Hydrogeochemical evaluation of groundwater of Bhaktapur Municipality, Nepal. Environ Earth Sci 74:4973–4988. doi: 10.1007/s12665-015-4514-4

Thakur JK, Singh P, Singh SK, Bhaghel B (2013) Geochemical modelling of fluoride concentration in hard rock terrain of Madhya Pradesh, India. Acta Geol Sin 87:1421–1433. doi: 10.1111/1755-6724.12139

Thivya C, Chidambaram S, Rao MS, et al (2017) Assessment of fluoride contaminations in groundwater of hard rock aquifers in Madurai district, Tamil Nadu (India). Appl Water Sci 7:1011–1023. doi: 10.1007/s13201-015-0312-0

Thole B (2013) Ground water contamination with fluoride and potential fluoride removal technologies for east and southern Africa. In: Dar IA, Dar MA (eds) Perspectives in water pollution. InTech, pp 65–95

Thuy TT, Nakagaki H, Thanh Ha NT, et al (2003) Fluoride profiles in premolars after different durations of water fluoridation in Ho Chi Minh City, Vietnam. Arch Oral Biol 48:369–376. doi: 10.1016/S0003-9969(03)00013-X

Tirumalesh K, Shivanna K, Jalihal AA (2007) Isotope hydrochemical approach to understand fluoride release into groundwaters of Ilkal area, Bagalkot District, Karnataka, India. Hydrogeol J 15:589–598. doi: 10.1007/s10040-006-0107-3

Toma S, Kreidman J, Vedina O, Veliksar S (1999) Some observations on fluoride problems in the Moldova Republic. Fluoride 32:67–70.

Trivedi MH, Sangai NP, Patel RS, et al (2012) Assessment of groundwater quality with special reference to fluoride and its impact on iq of schoolchildren in six villages of the Mundra region, Kachchh, Gujarat, India. Fluoride 45:377–383.

Tukur A, N. AA (2014) Fluoride contamination of shallow groundwater in parts of Zango local government area of Katsina State, northwest Nigeria. J Geosci Geomatics 2:178–185. doi: 10.12691/JGG-2-5-1

Udayalaxmi G, Himabindu D, Ramadass G (2010) Geochemical Evaluation of Groundwater Quality in Selected Areas of Hyderabad, A.P., India. Indian J Sci Technol 3:546–553. doi: 10.17485/IJST/2010/V3I5/29751

Ullah R, Malik RN, Qadir A (2009) Assessment of groundwater contamination in an industrial city, Sialkot, Pakistan. African J Environ Sci Technol 3:429–446. doi: 10.5897/AJEST09.031

Valenzuela-Vásquez L, Ramírez-Hernández J, Reyes-López J, et al (2006) The origin of fluoride in groundwater supply to Hermosillo City, Sonora, México. Environ Geol 51:17–27. doi: 10.1007/s00254-006-0300-7

Van Der Hoek W, Ekanayake L, Rajasooriyar L, Karunaratne R (2003) Source of drinking water and other risk factors for dental fluorosis in Sri Lanka. Int J Environ Health Res 13:285–293. doi: 10.1080/0960312031000122433

Vasanthavigar M, Srinivasamoorthy K, Vijayaragavan K, et al (2010) Application of water quality index for groundwater quality assessment: Thirumanimuttar sub-basin, Tamilnadu, India. Environ Monit Assess 171:595–609. doi: 10.1007/s10661-009-1302-1

Verma DK, Bhunia GS, Shit PK, et al (2017) Spatial variability of groundwater quality of Sabour block, Bhagalpur district (Bihar, India). Appl Water Sci 7:1997–2008. doi: 10.1007/s13201-016-0380-9

Verma KN, Pathak V, Yadav DC, Pathak P (2000) Study of the quality of ground waters of some villages at Shikohabad, District Firozabad (India). Asian J Chem 12:458–462.

Vikas C, Kushwaha RK, Pandit MK (2009) Hydrochemical status of groundwater in district Ajmer (NW India) with reference to fluoride distribution. J Geol Soc India 73:773–784. doi: 10.1007/s12594-009-0062-4

Vilasrao GS, Kamble KM, Sabat RN (2014) Child fluorosis in Chhattisgarh, India: A community-based survey. Indian Pediatr 51:903–905. doi: 10.1007/s13312-014-0525-6

Viswanathan G, Jaswanth A, Gopalakrishnan S, et al (2009) Determining the optimal fluoride concentration in drinking water for fluoride endemic regions in South India. Sci Total Environ 407:5298–5307. doi: 10.1016/j.scitotenv.2009.06.028

Walia T, Abu Fanas S, Akbar M, et al (2017) Estimation of fluoride concentration in drinking water and common beverages in United Arab Emirates (UAE). Saudi Dent J 29:117–122. doi: 10.1016/j.sdentj.2017.04.002

Wambu EW, Agong SG, Anyango B, et al (2014) High fluoride water in Bondo-Rarieda area of Siaya County, Kenya: a hydro-geological implication on public health in the Lake Victoria Basin. BMC Public Health 14:462. doi: 10.1186/1471-2458-14-462

Wang S, Song X, Wang Q, et al (2009) Shallow groundwater dynamics in North China Plain. J Geogr Sci 19:175–188. doi: 10.1007/s11442-009-0175-0

Windom HL (1971) Fluoride concentration in coastal and estuarine waters of Georgia. Limnol Oceanogr 16:806–810. doi: 10.4319/lo.1971.16.5.0806

Wongdem JG, Aderinokun GA, Ubom GA, et al (2001) Dental fluorosis and fluoride mapping in Langtang town, Nigeria. Afr J Med Med Sci 30:31–34.

Wu TN, Lee JY, Huang CH (2010) Application of time series analysis on temporal variation of fluoride in groundwater around Southern Taiwan Science Park. In: 7th International Conference on Fuzzy Systems and Knowledge Discovery, FSKD 2010. pp 2255–2259

Xu F, Ma T, Shi L, et al (2013) The hydrogeochemical characteristics of high iodine and fluoride groundwater in the Hetao plain, inner Mongolia. Procedia Earth Planet Sci 7:908–911. doi: 10.1016/j.proeps.2013.03.183

Yasmin S, Ranjan S, D’Souza D (2014) Haematological changes in fluorotic adults and children in fluoride endemic regions of Gaya district, Bihar, India. Environ Geochem Health 36:421–425. doi: 10.1007/s10653-013-9570-7

Zhang B, Mei H, Zhao Y, et al (2003) Distribution and risk assessment of fluoride in drinking water in the west plain region of Jilin Province, China. Environ Geochem Health 25:421–431. doi: 10.1023/B:EGAH.0000004560.47697.91
